# Supplementary material for: Multimodal factor evaluation system for organismal transparency by hyperspectral imaging
Source: PLoS One. 2023 Oct 11;18(10):e0292524. doi: 10.1371/journal.pone.0292524 (PMC10566722; doi:10.1371/journal.pone.0292524)
Supplement: S1 File — (XLSX) [file pone.0292524.s009.xlsx]

## Sheet: drugs
	380	385	390	395	400	405	410	415	420	425	430	435	440	445	450	455	460	465	470	475	480	485	490	495	500	505	510	515	520	525	530	535	540	545	550	555	560	565	570	575	580	585	590	595	600	605	610	615	620
SW	0.909153	0.904919	0.895975	0.879945	0.81683	0.79544	0.790252	0.78949	0.79411	0.804279	0.819778	0.834598	0.84477	0.854361	0.86021	0.865941	0.870534	0.875872	0.87989	0.884126	0.887674	0.891466	0.894613	0.897762	0.899814	0.901908	0.902183	0.904189	0.904838	0.906115	0.90702	0.909056	0.908914	0.909018	0.909304	0.909254	0.91047	0.910967	0.911234	0.911073	0.911261	0.910816	0.90991	0.909843	0.909079	0.909159	0.908073	0.908427	0.907972
SW	0.878013	0.876435	0.872502	0.856356	0.797417	0.776171	0.773836	0.774909	0.779543	0.788869	0.805342	0.819283	0.830531	0.839191	0.844468	0.851097	0.855338	0.860436	0.86359	0.868216	0.870698	0.874374	0.876552	0.879924	0.881618	0.883335	0.884221	0.884741	0.885263	0.886763	0.887452	0.888589	0.888924	0.888829	0.888564	0.888525	0.889367	0.88923	0.889614	0.888586	0.887894	0.887428	0.886474	0.88626	0.885127	0.884195	0.884467	0.884302	0.8835
SW	0.867362	0.867859	0.86191	0.848128	0.791856	0.772636	0.768996	0.768881	0.773509	0.781421	0.79678	0.810574	0.821114	0.830543	0.835926	0.842899	0.846512	0.852821	0.856612	0.86176	0.864867	0.868731	0.872307	0.875944	0.878673	0.880212	0.881943	0.883729	0.884586	0.886579	0.887652	0.889261	0.890459	0.891015	0.891425	0.892053	0.893388	0.893576	0.894726	0.894343	0.893991	0.893707	0.893235	0.89311	0.892345	0.892333	0.892155	0.892389	0.891589
SW	0.905695	0.905253	0.899196	0.877657	0.810737	0.783573	0.776332	0.77585	0.778894	0.787405	0.802651	0.815501	0.826296	0.835503	0.841296	0.8487	0.8535	0.860101	0.864896	0.869822	0.874253	0.87841	0.88238	0.88624	0.889542	0.892052	0.893915	0.896259	0.897442	0.899392	0.900945	0.903101	0.904168	0.905415	0.906186	0.906448	0.908499	0.909162	0.910199	0.910199	0.910396	0.910188	0.910611	0.910846	0.910648	0.910774	0.910168	0.910586	0.910609
SW	0.899695	0.896736	0.892215	0.867901	0.789671	0.761168	0.756083	0.755439	0.759816	0.76841	0.784689	0.798327	0.809682	0.818521	0.825574	0.831488	0.837085	0.842123	0.847336	0.851154	0.85594	0.859346	0.86351	0.866846	0.869401	0.872273	0.873885	0.876199	0.878355	0.879259	0.881556	0.884277	0.884644	0.885931	0.887202	0.887561	0.889902	0.890898	0.891711	0.892204	0.892689	0.893483	0.893566	0.893914	0.894588	0.894761	0.894923	0.895645	0.896135
SW	0.916669	0.914473	0.909469	0.886501	0.80426	0.776025	0.771688	0.772937	0.778196	0.787319	0.803269	0.817852	0.829843	0.837438	0.844474	0.850349	0.856334	0.861805	0.866356	0.8711	0.875025	0.878717	0.882168	0.885927	0.888198	0.891217	0.891732	0.894477	0.895386	0.89724	0.899125	0.901247	0.901414	0.90285	0.903791	0.904833	0.90744	0.908478	0.909197	0.910764	0.910842	0.911127	0.911941	0.912911	0.913684	0.914644	0.915211	0.916196	0.916914
SW	0.911329	0.914896	0.902534	0.883857	0.814146	0.785043	0.778886	0.778397	0.782228	0.789994	0.805717	0.819104	0.830335	0.838585	0.845284	0.851913	0.857172	0.863059	0.867491	0.871841	0.875547	0.879739	0.883037	0.886992	0.889332	0.892346	0.893589	0.896105	0.897354	0.899878	0.901545	0.903705	0.904269	0.905136	0.906309	0.907067	0.908677	0.910121	0.910569	0.911612	0.912133	0.912502	0.912573	0.913593	0.913629	0.913763	0.914344	0.915263	0.914914
Actinomycin	0.924037	0.918439	0.908122	0.900407	0.824369	0.800872	0.792379	0.794674	0.800637	0.819856	0.847427	0.867264	0.884943	0.896424	0.906001	0.913783	0.918365	0.921227	0.922923	0.923965	0.923694	0.923652	0.923168	0.922051	0.922927	0.923096	0.923037	0.923506	0.923682	0.925085	0.924952	0.927374	0.926925	0.927012	0.927374	0.926455	0.928269	0.928736	0.92815	0.927913	0.928313	0.92716	0.926697	0.926704	0.926209	0.9253	0.925697	0.925734	0.925132
Actinomycin	0.877736	0.872228	0.861951	0.851509	0.781603	0.75459	0.748108	0.747191	0.755527	0.766447	0.785831	0.797945	0.808858	0.818494	0.825428	0.83234	0.835604	0.839019	0.84056	0.843372	0.843633	0.845507	0.844888	0.846415	0.847807	0.849247	0.850579	0.852092	0.853136	0.854929	0.856105	0.858233	0.85907	0.860331	0.860735	0.861709	0.863788	0.865334	0.865247	0.866545	0.866946	0.866947	0.867635	0.868488	0.868814	0.869302	0.8699	0.87097	0.871302
Actinomycin	0.962024	0.957087	0.952754	0.928775	0.856641	0.835141	0.828668	0.823263	0.841357	0.873011	0.904148	0.925492	0.936448	0.94488	0.950931	0.957231	0.961773	0.96763	0.969725	0.974574	0.974743	0.977622	0.979215	0.98233	0.984029	0.985601	0.987136	0.988442	0.98916	0.991251	0.991452	0.99323	0.9937	0.993645	0.993647	0.993571	0.995153	0.994924	0.994625	0.993705	0.993331	0.992852	0.991804	0.991008	0.991588	0.989355	0.989535	0.988392	0.98784
Actinomycin	0.943621	0.92781	0.925163	0.909186	0.83456	0.817421	0.802577	0.805163	0.808294	0.801247	0.800616	0.809368	0.822132	0.832771	0.841848	0.849902	0.855634	0.860475	0.86302	0.866478	0.866144	0.869433	0.868657	0.871819	0.87142	0.874643	0.873913	0.876575	0.877749	0.879228	0.880382	0.881908	0.882138	0.882727	0.88277	0.882722	0.884171	0.883668	0.884717	0.883323	0.883672	0.883166	0.882367	0.881459	0.881983	0.880454	0.88118	0.880992	0.881138
Actinomycin	0.915018	0.907741	0.900948	0.883867	0.812343	0.788097	0.784414	0.784815	0.783015	0.802343	0.830554	0.846063	0.858175	0.866753	0.874719	0.881463	0.889005	0.894063	0.896721	0.901258	0.901238	0.903793	0.902628	0.905745	0.90657	0.90862	0.910233	0.912354	0.914311	0.916077	0.919497	0.92178	0.923891	0.926239	0.926929	0.929632	0.931651	0.933338	0.935329	0.936818	0.937362	0.938796	0.939285	0.940753	0.942018	0.942546	0.943609	0.945496	0.946813
Actinomycin	0.916819	0.908127	0.899032	0.879781	0.815589	0.787983	0.780893	0.78201	0.776373	0.769503	0.765198	0.773665	0.786403	0.798506	0.807618	0.818927	0.82553	0.831672	0.835729	0.838656	0.840858	0.843186	0.844847	0.848675	0.850795	0.853763	0.856571	0.85914	0.862398	0.864413	0.866808	0.870637	0.872011	0.874631	0.875519	0.876728	0.879397	0.880265	0.881986	0.882603	0.883535	0.883507	0.883545	0.88517	0.886714	0.886254	0.887055	0.888411	0.889255
Actinomycin	0.931532	0.924672	0.914374	0.900965	0.824826	0.802581	0.792776	0.792427	0.799302	0.810577	0.826807	0.836417	0.847781	0.857756	0.865857	0.873917	0.879198	0.88364	0.885662	0.889161	0.888729	0.891317	0.890615	0.89228	0.892776	0.894001	0.894006	0.895715	0.896119	0.897331	0.898066	0.89954	0.899633	0.899893	0.900427	0.899752	0.9012	0.901899	0.90168	0.900978	0.901091	0.900877	0.899966	0.90028	0.899844	0.898873	0.898959	0.899984	0.899394
Actinomycin	0.917277	0.926033	0.913175	0.891203	0.826416	0.804731	0.796642	0.794531	0.798784	0.798653	0.797468	0.803271	0.810921	0.818989	0.828865	0.838987	0.84491	0.851067	0.853603	0.858159	0.857437	0.859924	0.859519	0.863129	0.862115	0.864512	0.864226	0.867111	0.867357	0.869087	0.870737	0.872318	0.872739	0.873614	0.873335	0.872943	0.87499	0.875064	0.875869	0.874508	0.874694	0.873775	0.872797	0.872034	0.872266	0.870109	0.870662	0.870441	0.87033
2DG	0.910637	0.917683	0.910191	0.887019	0.8181	0.799883	0.788611	0.790492	0.790847	0.798267	0.811727	0.827247	0.839471	0.849665	0.857206	0.864784	0.869708	0.875429	0.880222	0.88519	0.888969	0.893309	0.89723	0.901815	0.904348	0.90766	0.908777	0.911345	0.91289	0.915082	0.916891	0.918655	0.919728	0.920621	0.921722	0.922591	0.924576	0.925939	0.926351	0.926976	0.926918	0.927487	0.927163	0.927685	0.927988	0.928289	0.927932	0.928795	0.929298
2DG	0.913182	0.916962	0.910734	0.887637	0.823129	0.796363	0.787585	0.788632	0.795485	0.809203	0.832885	0.851761	0.864762	0.874113	0.881681	0.886964	0.892239	0.897057	0.900147	0.903668	0.90672	0.910027	0.912774	0.915839	0.917542	0.919425	0.920337	0.921456	0.922534	0.923755	0.924664	0.926625	0.927216	0.927909	0.928587	0.929039	0.930983	0.931748	0.932367	0.9329	0.933171	0.933177	0.933223	0.933374	0.933379	0.933813	0.934008	0.934528	0.934585
2DG	0.918225	0.915219	0.90919	0.889254	0.824712	0.795972	0.789667	0.78678	0.785614	0.790986	0.80327	0.818977	0.831646	0.842924	0.851225	0.859449	0.864715	0.87049	0.875477	0.880044	0.884141	0.888665	0.892768	0.896638	0.900042	0.902417	0.904494	0.906124	0.908118	0.909573	0.910587	0.912787	0.913773	0.914306	0.914515	0.915029	0.916662	0.917241	0.917387	0.917708	0.917164	0.916829	0.916423	0.916449	0.915691	0.915736	0.914705	0.914554	0.914727
2DG	0.923232	0.924946	0.919264	0.89672	0.82513	0.803214	0.798692	0.800931	0.805581	0.824056	0.852776	0.870773	0.885348	0.893648	0.900629	0.906831	0.910695	0.915332	0.918105	0.92198	0.924177	0.927634	0.930327	0.933386	0.935376	0.937579	0.937781	0.939464	0.939758	0.940978	0.941849	0.943523	0.944163	0.944323	0.944836	0.945185	0.946659	0.947437	0.947631	0.947701	0.947455	0.947519	0.947322	0.947034	0.947347	0.946744	0.947077	0.947419	0.946976
2DG	0.888235	0.881545	0.872043	0.857278	0.786776	0.760797	0.756312	0.75593	0.758318	0.770917	0.784473	0.796033	0.804153	0.811262	0.816639	0.822205	0.826585	0.831965	0.835932	0.840785	0.844328	0.848874	0.85273	0.856783	0.859556	0.862565	0.864447	0.866823	0.868332	0.870749	0.872432	0.874372	0.875977	0.876962	0.87834	0.879392	0.881081	0.882784	0.883546	0.883991	0.885117	0.885382	0.885852	0.886427	0.886555	0.887013	0.886781	0.887457	0.888119
2DG	0.898692	0.895144	0.893416	0.870524	0.801791	0.777515	0.776538	0.774005	0.781579	0.793551	0.811263	0.824892	0.832555	0.838907	0.843649	0.847701	0.85189	0.856857	0.859196	0.864527	0.866809	0.871068	0.873882	0.877789	0.879777	0.882798	0.883112	0.885807	0.887203	0.88955	0.891688	0.893234	0.89481	0.895459	0.896927	0.897903	0.900277	0.901339	0.902599	0.902967	0.904086	0.904043	0.904689	0.90527	0.905705	0.906178	0.906443	0.907446	0.907526
2DG	0.923792	0.92179	0.918126	0.900627	0.82816	0.804791	0.794993	0.797872	0.794549	0.789309	0.793094	0.808516	0.819435	0.831054	0.838999	0.847466	0.852187	0.858936	0.863362	0.870017	0.872857	0.877979	0.881446	0.886876	0.88918	0.893108	0.894021	0.896323	0.898071	0.899581	0.901434	0.902391	0.90402	0.904476	0.904372	0.905705	0.90647	0.907042	0.907343	0.906391	0.906313	0.90614	0.904784	0.904002	0.904069	0.903411	0.903721	0.903307	0.902945
2DG	0.903267	0.908394	0.896377	0.875255	0.80691	0.780157	0.779825	0.778092	0.7806	0.793947	0.810721	0.82676	0.837675	0.84645	0.853034	0.85981	0.864263	0.87079	0.875519	0.880888	0.884334	0.889298	0.892737	0.897296	0.900046	0.902624	0.904278	0.905759	0.907506	0.908734	0.910517	0.911664	0.912462	0.912851	0.913005	0.9133	0.914524	0.915096	0.915467	0.915316	0.914693	0.914094	0.913833	0.912826	0.912537	0.912018	0.911661	0.9114	0.910887
2DG	0.913313	0.915221	0.909253	0.886499	0.819465	0.79663	0.7907	0.789441	0.789771	0.792854	0.797094	0.808791	0.818514	0.828789	0.836198	0.844682	0.849332	0.855312	0.859506	0.865622	0.869253	0.874653	0.878226	0.883737	0.886837	0.890692	0.892258	0.895154	0.897105	0.898628	0.901468	0.90278	0.904523	0.905571	0.905751	0.906911	0.908756	0.909466	0.91033	0.910802	0.910499	0.910627	0.910438	0.910824	0.911506	0.911043	0.911854	0.911989	0.91289
Oligomycin	0.885137	0.876693	0.871503	0.851764	0.773407	0.741109	0.733112	0.730668	0.732046	0.736114	0.748452	0.761022	0.77139	0.778662	0.78448	0.789709	0.794929	0.800025	0.803803	0.808552	0.812277	0.816378	0.818984	0.822679	0.82544	0.828295	0.829752	0.83261	0.833932	0.836168	0.838069	0.839831	0.841424	0.843446	0.844633	0.846467	0.848469	0.851199	0.851932	0.853751	0.854666	0.855077	0.857073	0.858582	0.858856	0.861594	0.862148	0.864282	0.864794
Oligomycin	0.874601	0.877369	0.865501	0.849009	0.779235	0.752325	0.74712	0.745522	0.747202	0.751876	0.765032	0.778315	0.789209	0.795884	0.802036	0.80753	0.812489	0.817342	0.821487	0.82573	0.829409	0.833225	0.835779	0.83946	0.841158	0.844605	0.845884	0.848419	0.849422	0.851647	0.8533	0.8551	0.855693	0.856996	0.858008	0.859357	0.861944	0.863535	0.863728	0.865234	0.865956	0.866289	0.86722	0.868606	0.869478	0.870603	0.871097	0.87265	0.873384
Oligomycin	0.843238	0.841936	0.834077	0.816755	0.751816	0.724707	0.719515	0.71773	0.718715	0.721782	0.733367	0.746134	0.755759	0.762856	0.768228	0.773036	0.778142	0.783932	0.78802	0.792963	0.795982	0.800067	0.802665	0.806794	0.80842	0.812389	0.814023	0.817055	0.818397	0.821299	0.822574	0.825262	0.825578	0.827689	0.82873	0.829675	0.831594	0.832722	0.83384	0.835126	0.836046	0.836674	0.837249	0.838425	0.838274	0.840049	0.839801	0.842035	0.842608
Oligomycin	0.870672	0.875192	0.869286	0.847967	0.775766	0.747259	0.742405	0.739503	0.740491	0.74403	0.754925	0.767674	0.778096	0.785086	0.790007	0.79448	0.799571	0.805071	0.809843	0.814088	0.817716	0.821525	0.823805	0.827445	0.829021	0.832839	0.833999	0.836589	0.83777	0.839937	0.841214	0.843554	0.843497	0.844851	0.845464	0.845742	0.847741	0.84818	0.849391	0.849993	0.850804	0.850512	0.85063	0.851477	0.851509	0.852243	0.85182	0.853372	0.853035
Oligomycin	0.865034	0.860956	0.850894	0.829257	0.740187	0.708977	0.703967	0.701994	0.704122	0.708214	0.719584	0.731541	0.742587	0.74905	0.755501	0.759494	0.765718	0.771219	0.776518	0.780742	0.785317	0.789286	0.792538	0.796294	0.798891	0.803099	0.804768	0.80835	0.810292	0.812341	0.814959	0.8176	0.818962	0.821554	0.822376	0.824101	0.826343	0.82943	0.82971	0.832952	0.833981	0.834947	0.836218	0.838375	0.839536	0.841506	0.842531	0.84458	0.845289
Oligomycin	0.854257	0.845221	0.829735	0.821484	0.739994	0.704532	0.696796	0.694496	0.694776	0.695633	0.706545	0.718158	0.727391	0.733597	0.73761	0.743042	0.746875	0.754034	0.757187	0.763179	0.764842	0.769738	0.771621	0.776225	0.778569	0.781989	0.784109	0.787046	0.787928	0.790914	0.792176	0.794651	0.795858	0.797479	0.798493	0.800568	0.802923	0.80464	0.804842	0.806957	0.807703	0.808959	0.81094	0.812639	0.812916	0.815684	0.816985	0.818744	0.820236
Oligomycin	0.843115	0.841504	0.834148	0.821818	0.740272	0.71223	0.707137	0.705996	0.7058	0.710262	0.722319	0.73555	0.74682	0.754148	0.760287	0.765649	0.771129	0.777029	0.781739	0.786248	0.790618	0.794435	0.797886	0.802738	0.80413	0.809198	0.810953	0.814943	0.81704	0.819609	0.821633	0.824186	0.825098	0.828029	0.829142	0.829414	0.832772	0.834194	0.83578	0.837621	0.838215	0.839244	0.840494	0.842686	0.842773	0.84446	0.845267	0.846891	0.847642
Oligomycin	0.86798	0.864204	0.863095	0.84464	0.777327	0.745644	0.737417	0.733221	0.73334	0.735157	0.747645	0.759768	0.76919	0.777583	0.782376	0.789914	0.793394	0.799481	0.802893	0.807894	0.810524	0.815308	0.817635	0.821824	0.823903	0.826807	0.829016	0.831796	0.832761	0.836396	0.837362	0.840216	0.841606	0.842521	0.843879	0.845172	0.847555	0.848623	0.850078	0.850645	0.851514	0.852675	0.852983	0.854203	0.855068	0.856066	0.856508	0.857951	0.857937
Oligomycin	0.854374	0.849419	0.83737	0.826571	0.745468	0.708791	0.699349	0.696715	0.695627	0.696401	0.708078	0.721192	0.730342	0.738275	0.741598	0.748251	0.752016	0.759057	0.761724	0.767563	0.769403	0.774391	0.776671	0.780758	0.783232	0.786246	0.788217	0.791175	0.792316	0.795858	0.797125	0.79893	0.800173	0.802045	0.803202	0.804716	0.80754	0.808835	0.81046	0.811858	0.812655	0.812895	0.814414	0.815804	0.81574	0.818482	0.819322	0.822021	0.821917
ML-7	0.647116	0.641869	0.621288	0.587925	0.443911	0.366216	0.343665	0.331659	0.328143	0.327204	0.330652	0.331763	0.335	0.337829	0.343488	0.346512	0.351484	0.354435	0.359742	0.362926	0.36816	0.371824	0.376566	0.380654	0.385097	0.389141	0.393276	0.397282	0.402274	0.405762	0.411227	0.415195	0.420101	0.426191	0.429857	0.435478	0.438903	0.445079	0.448282	0.454474	0.457561	0.461047	0.466966	0.473301	0.477368	0.483869	0.487883	0.494406	0.497958
ML-7	0.715407	0.713026	0.694179	0.671582	0.565947	0.51052	0.494424	0.488285	0.488609	0.491497	0.497839	0.500847	0.505875	0.510385	0.516847	0.521557	0.527299	0.532019	0.537584	0.542414	0.547245	0.552248	0.557039	0.562047	0.565939	0.570986	0.574378	0.579273	0.583422	0.587568	0.591862	0.596844	0.600143	0.605754	0.60963	0.613871	0.61784	0.622265	0.625265	0.629668	0.632853	0.635164	0.63926	0.644611	0.647892	0.653197	0.656193	0.661478	0.665408
ML-7	0.718456	0.714464	0.697356	0.667803	0.539027	0.484765	0.473937	0.467907	0.468389	0.47222	0.47849	0.482085	0.487113	0.491911	0.499053	0.503306	0.509284	0.513419	0.519438	0.523813	0.529108	0.533859	0.538504	0.543558	0.547298	0.552682	0.555685	0.560795	0.564796	0.569126	0.573123	0.578035	0.58119	0.586471	0.590016	0.593744	0.597811	0.601759	0.604859	0.60894	0.611959	0.614096	0.617693	0.622941	0.625664	0.630689	0.633533	0.638823	0.642253
ML-7	0.687619	0.686749	0.666736	0.637047	0.504826	0.433167	0.413958	0.407418	0.408123	0.410751	0.418004	0.421924	0.428131	0.433789	0.441798	0.447736	0.455318	0.46074	0.46833	0.474065	0.481625	0.487227	0.494255	0.50035	0.50667	0.512801	0.518595	0.524319	0.530739	0.535611	0.542456	0.547793	0.553689	0.561363	0.565916	0.572385	0.576752	0.583263	0.587534	0.593996	0.59814	0.601837	0.60784	0.614582	0.619161	0.625465	0.629394	0.635178	0.639452
ML-7	0.680281	0.670656	0.65822	0.634915	0.524566	0.47196	0.458629	0.452645	0.452049	0.454264	0.459849	0.46257	0.466779	0.47094	0.47641	0.481028	0.485787	0.490545	0.495594	0.500459	0.504947	0.509539	0.513926	0.518931	0.523174	0.527563	0.530949	0.535838	0.539623	0.543999	0.548235	0.552845	0.556432	0.561468	0.565403	0.569595	0.573469	0.577591	0.580776	0.585322	0.588029	0.590541	0.594436	0.599974	0.60305	0.608174	0.611805	0.616894	0.62032
ML-7	0.682278	0.678422	0.665058	0.642211	0.543576	0.490825	0.473747	0.467562	0.467646	0.469396	0.475864	0.478545	0.483636	0.488459	0.494852	0.499784	0.505401	0.51015	0.515928	0.521036	0.526003	0.531029	0.535846	0.541143	0.545199	0.550253	0.554089	0.559053	0.563021	0.567707	0.572057	0.57681	0.580515	0.586137	0.589606	0.59423	0.597901	0.602335	0.605598	0.609795	0.613036	0.615566	0.619871	0.625283	0.628168	0.6337	0.63676	0.642484	0.645737
ML-7	0.613013	0.61039	0.596497	0.567486	0.458907	0.405635	0.391073	0.386192	0.3854	0.388294	0.394237	0.397528	0.4025	0.407105	0.413261	0.41788	0.423236	0.427692	0.433001	0.437459	0.44238	0.447355	0.451762	0.456662	0.46097	0.465623	0.469101	0.474011	0.478154	0.482513	0.486718	0.491537	0.495585	0.500875	0.504895	0.509258	0.513379	0.51819	0.521525	0.526352	0.529605	0.532257	0.5374	0.543253	0.546506	0.552793	0.556433	0.56246	0.566321
ML-7	0.62774	0.621225	0.611977	0.585971	0.491025	0.445091	0.433677	0.429285	0.429299	0.432981	0.438687	0.442707	0.447749	0.452687	0.459621	0.464327	0.470218	0.475262	0.48125	0.486321	0.491683	0.496724	0.501981	0.507402	0.512123	0.517493	0.521443	0.526664	0.531278	0.536157	0.540947	0.545693	0.550071	0.556004	0.5603	0.56532	0.569603	0.574607	0.577888	0.583106	0.586347	0.589007	0.594261	0.600258	0.603605	0.609857	0.613246	0.619506	0.62315
ML-7	0.636859	0.626063	0.611167	0.585071	0.480561	0.433136	0.424069	0.42014	0.422266	0.426755	0.433549	0.437503	0.442735	0.447766	0.454866	0.45961	0.465424	0.470303	0.476283	0.481151	0.486865	0.492026	0.497209	0.502453	0.507248	0.512376	0.516314	0.521545	0.52639	0.530662	0.53539	0.540344	0.544562	0.550294	0.55432	0.558944	0.563119	0.567647	0.57095	0.575516	0.578904	0.581508	0.586259	0.592134	0.595421	0.600878	0.604341	0.609707	0.612993
ML-7	0.66111	0.651479	0.637581	0.609887	0.501683	0.446585	0.431166	0.425458	0.425048	0.427793	0.434352	0.437961	0.443251	0.44842	0.455903	0.460617	0.466827	0.471661	0.478137	0.482743	0.4884	0.493462	0.498553	0.504096	0.508586	0.514201	0.517687	0.523238	0.527586	0.53227	0.536756	0.541817	0.546158	0.55133	0.555542	0.559682	0.563972	0.568437	0.571759	0.576292	0.579609	0.582085	0.586585	0.591728	0.595248	0.600747	0.603882	0.609665	0.612939
ML-7	0.663967	0.660034	0.647641	0.617492	0.501402	0.443778	0.427337	0.422646	0.421444	0.424883	0.430992	0.433857	0.438601	0.443035	0.449232	0.4535	0.458395	0.462656	0.467585	0.471672	0.475985	0.480248	0.484167	0.488497	0.492096	0.49625	0.499043	0.503172	0.506712	0.510368	0.513911	0.51822	0.52136	0.526039	0.529118	0.532935	0.536464	0.540412	0.543362	0.547399	0.550498	0.552223	0.556488	0.561576	0.56437	0.569791	0.573329	0.578683	0.581659
ML-7	0.600999	0.591758	0.57902	0.554955	0.447648	0.39017	0.373489	0.368587	0.367953	0.371099	0.377588	0.381641	0.387128	0.392817	0.400182	0.405576	0.412277	0.417566	0.424261	0.429639	0.435994	0.441652	0.447565	0.453402	0.458624	0.464386	0.469103	0.47459	0.480106	0.48501	0.490549	0.495571	0.500492	0.507211	0.51176	0.5172	0.521679	0.527378	0.531104	0.536619	0.540524	0.543679	0.549314	0.556204	0.559985	0.566774	0.570588	0.576976	0.580713
ML-7	0.636515	0.629713	0.615272	0.587431	0.479824	0.426624	0.413995	0.408612	0.409424	0.413281	0.420319	0.424596	0.430075	0.435496	0.443088	0.448271	0.454754	0.459922	0.466205	0.471466	0.477265	0.482479	0.488063	0.493624	0.498355	0.504197	0.508183	0.513794	0.51846	0.523466	0.528356	0.533678	0.538271	0.544019	0.548329	0.55342	0.557852	0.562704	0.566494	0.571584	0.575377	0.57785	0.583241	0.589025	0.592892	0.598987	0.602493	0.608349	0.612279
ML-7	0.640686	0.63724	0.620024	0.593843	0.477166	0.42317	0.414463	0.410355	0.411932	0.4154	0.421847	0.425523	0.431144	0.435631	0.443401	0.44822	0.454967	0.459824	0.4665	0.471705	0.477998	0.483372	0.489585	0.494967	0.500826	0.506461	0.511432	0.516865	0.52274	0.527319	0.533242	0.538587	0.543872	0.550703	0.55485	0.561013	0.565119	0.57142	0.575011	0.581002	0.584428	0.587506	0.593742	0.600767	0.604455	0.611029	0.614588	0.619978	0.623716
Cycloheximide	0.889294	0.881318	0.877978	0.851783	0.774958	0.743639	0.73429	0.733147	0.734795	0.740703	0.755741	0.768358	0.778815	0.7874	0.792809	0.799562	0.803916	0.809802	0.812949	0.817937	0.821209	0.824975	0.82807	0.832021	0.834812	0.837152	0.838501	0.840887	0.842184	0.844357	0.845801	0.848361	0.849323	0.850596	0.852026	0.852428	0.854885	0.855558	0.85691	0.856838	0.857493	0.857795	0.857911	0.859427	0.859153	0.859553	0.859764	0.860514	0.860742
Cycloheximide	0.891914	0.887017	0.880713	0.859922	0.788675	0.762322	0.756455	0.755638	0.757858	0.764237	0.780536	0.795155	0.805645	0.81476	0.820883	0.827399	0.832507	0.837797	0.841713	0.846018	0.849536	0.853241	0.856777	0.860365	0.862668	0.865438	0.866613	0.868816	0.870311	0.872243	0.873501	0.876311	0.876766	0.87751	0.878609	0.878634	0.880999	0.881423	0.882359	0.881925	0.882164	0.88266	0.88248	0.882612	0.882789	0.88318	0.883122	0.883132	0.883005
Cycloheximide	0.902859	0.901994	0.891468	0.872851	0.784399	0.758043	0.757879	0.755417	0.75853	0.765453	0.780604	0.794562	0.804106	0.812811	0.818295	0.823689	0.827665	0.832801	0.835859	0.839386	0.841883	0.844752	0.847215	0.85015	0.851269	0.852889	0.853015	0.85397	0.854553	0.855171	0.855651	0.857034	0.856608	0.856291	0.8564	0.855635	0.857229	0.856398	0.856238	0.855381	0.854835	0.854615	0.852993	0.852899	0.85235	0.851071	0.850073	0.850737	0.849358
Cycloheximide	0.883508	0.886712	0.873953	0.854872	0.76866	0.740708	0.738679	0.738347	0.741547	0.749577	0.764954	0.779097	0.789763	0.797815	0.804032	0.809946	0.814243	0.819439	0.823526	0.827349	0.831049	0.83488	0.83783	0.841572	0.843559	0.846784	0.847373	0.849928	0.851063	0.852975	0.854159	0.856659	0.857257	0.857888	0.8586	0.858948	0.861016	0.861656	0.863292	0.862866	0.862628	0.863201	0.863137	0.863759	0.86351	0.863712	0.863909	0.864591	0.864424
Cycloheximide	0.852538	0.85352	0.842136	0.82372	0.748279	0.725245	0.723962	0.723458	0.72615	0.732938	0.748181	0.76203	0.771955	0.780368	0.786209	0.79188	0.796847	0.801875	0.806093	0.810108	0.814131	0.817399	0.820916	0.824841	0.826793	0.830108	0.831242	0.833428	0.834993	0.837326	0.83927	0.84209	0.842844	0.844463	0.845352	0.845521	0.848	0.848992	0.850375	0.850464	0.851617	0.851625	0.851816	0.852665	0.853291	0.853148	0.853874	0.854795	0.854717
Cycloheximide	0.879967	0.879172	0.871782	0.842895	0.74841	0.72458	0.724312	0.72401	0.728313	0.737251	0.752597	0.766991	0.776663	0.784619	0.791216	0.795482	0.799849	0.804235	0.807869	0.810595	0.813549	0.81623	0.818681	0.821675	0.822314	0.824761	0.825022	0.825957	0.827243	0.828148	0.828522	0.831171	0.83063	0.830988	0.8311	0.830153	0.832326	0.832266	0.832341	0.831805	0.832252	0.831535	0.831276	0.830757	0.830924	0.830305	0.829301	0.829687	0.829324
Cycloheximide	0.888996	0.885621	0.877673	0.854283	0.77434	0.752308	0.750564	0.751418	0.755255	0.763164	0.779371	0.794201	0.805127	0.81353	0.820988	0.826691	0.832372	0.838346	0.843761	0.84811	0.853046	0.857357	0.861366	0.86574	0.86837	0.872368	0.873963	0.876762	0.878711	0.88096	0.883236	0.885801	0.886885	0.888099	0.889489	0.890683	0.892657	0.894268	0.895251	0.895935	0.895582	0.896137	0.896597	0.896834	0.896985	0.897827	0.897287	0.897199	0.896946
Cycloheximide	0.840274	0.838216	0.827829	0.80463	0.727679	0.69468	0.686288	0.685466	0.687281	0.692626	0.705976	0.718861	0.728242	0.736506	0.741309	0.747832	0.751749	0.757292	0.760299	0.765001	0.76732	0.771059	0.773705	0.777603	0.779469	0.782029	0.782937	0.785216	0.786279	0.788609	0.789388	0.792496	0.792824	0.794275	0.795425	0.795669	0.798418	0.798894	0.799896	0.800059	0.800941	0.801397	0.801434	0.802587	0.802971	0.80342	0.803863	0.805262	0.805322
Cycloheximide	0.863384	0.861477	0.851889	0.831401	0.765649	0.738962	0.733904	0.733727	0.736195	0.74264	0.758479	0.772767	0.783213	0.792073	0.797766	0.804569	0.809129	0.815129	0.818681	0.823499	0.827142	0.831328	0.834629	0.838957	0.841492	0.844698	0.846264	0.848855	0.850521	0.852993	0.854742	0.857677	0.858495	0.859835	0.861229	0.862175	0.864547	0.865477	0.866959	0.867383	0.867637	0.86822	0.868562	0.869165	0.869817	0.870678	0.870832	0.871755	0.871619
Cycloheximide	0.875787	0.872152	0.858187	0.837862	0.766667	0.736127	0.730836	0.732478	0.73627	0.743125	0.758938	0.773209	0.783708	0.792388	0.798135	0.804334	0.80861	0.81431	0.817986	0.822845	0.826374	0.830105	0.833105	0.837085	0.839568	0.84204	0.843666	0.846139	0.847356	0.849736	0.851152	0.853466	0.854644	0.856253	0.857729	0.858656	0.861135	0.862838	0.863576	0.864426	0.865028	0.865593	0.866455	0.867613	0.868536	0.869104	0.869159	0.870516	0.869904
Cycloheximide	0.896313	0.899316	0.892463	0.872442	0.789069	0.76111	0.759341	0.760232	0.764534	0.771986	0.788319	0.802488	0.81259	0.820688	0.826859	0.833055	0.837497	0.842594	0.846849	0.851015	0.854646	0.858042	0.86121	0.864902	0.867149	0.870027	0.871082	0.873516	0.874579	0.876272	0.877509	0.879891	0.88073	0.881478	0.882375	0.883263	0.885172	0.886198	0.886412	0.886876	0.886677	0.887002	0.887833	0.888133	0.887829	0.888342	0.888691	0.888686	0.888664
Cycloheximide	0.87167	0.869949	0.862556	0.834592	0.747968	0.718746	0.715571	0.714411	0.717675	0.723713	0.73869	0.75158	0.761683	0.769447	0.775677	0.782005	0.786154	0.792436	0.796324	0.800931	0.80469	0.808814	0.811904	0.816312	0.818595	0.822057	0.82342	0.826163	0.827779	0.830275	0.831905	0.834473	0.835234	0.836212	0.837163	0.838392	0.84078	0.841357	0.842431	0.843086	0.843598	0.843661	0.843983	0.844519	0.844306	0.845494	0.845215	0.845833	0.846043
DMSO 10%	0.584108	0.571266	0.561013	0.545558	0.48706	0.471942	0.455548	0.446962	0.430009	0.389612	0.329525	0.299193	0.281803	0.273916	0.267038	0.263797	0.257085	0.255002	0.250834	0.250716	0.248807	0.249861	0.248357	0.249449	0.248339	0.249847	0.248869	0.250529	0.250097	0.252008	0.251444	0.253183	0.253176	0.254282	0.256522	0.25644	0.25862	0.259571	0.26106	0.261369	0.264153	0.264746	0.264849	0.267041	0.269849	0.270281	0.273106	0.274441	0.277788
DMSO 10%	0.67193	0.662949	0.654135	0.632278	0.57032	0.545588	0.531551	0.52309	0.491685	0.441187	0.372294	0.344675	0.325536	0.319581	0.313323	0.310409	0.304352	0.302091	0.298163	0.298119	0.29615	0.297566	0.296277	0.298042	0.297167	0.298859	0.298091	0.300277	0.300196	0.302088	0.301538	0.304106	0.303738	0.305365	0.307881	0.307517	0.310584	0.310791	0.313601	0.313527	0.316473	0.317037	0.317429	0.319131	0.322341	0.323141	0.325969	0.327145	0.330437
DMSO 10%	0.653489	0.638833	0.635252	0.610905	0.547947	0.533577	0.510117	0.501256	0.471496	0.42839	0.354204	0.318331	0.298006	0.289893	0.282514	0.279327	0.27261	0.269971	0.265862	0.265608	0.263729	0.264596	0.263316	0.264291	0.263024	0.264338	0.263273	0.264873	0.264332	0.265945	0.265129	0.266763	0.266653	0.267646	0.269475	0.268888	0.271391	0.271555	0.273135	0.272959	0.27565	0.275867	0.275807	0.277507	0.279717	0.280228	0.282983	0.283792	0.286696
DMSO 10%	0.590782	0.577842	0.57438	0.545146	0.491738	0.472062	0.458319	0.44805	0.431727	0.405557	0.363657	0.338809	0.320917	0.315611	0.309181	0.306805	0.299962	0.297754	0.293504	0.294361	0.29285	0.294285	0.29335	0.295212	0.29441	0.295851	0.295507	0.29691	0.297016	0.298728	0.299149	0.300253	0.300714	0.302227	0.304005	0.304501	0.306396	0.307602	0.309502	0.31014	0.31283	0.313545	0.313969	0.315933	0.319042	0.319645	0.322882	0.324435	0.327581
DMSO 10%	0.557971	0.547645	0.545219	0.525674	0.472721	0.45888	0.450038	0.442988	0.430512	0.401081	0.355338	0.327883	0.310292	0.301929	0.295141	0.29095	0.28348	0.280774	0.276162	0.276193	0.273771	0.274996	0.273616	0.275241	0.273948	0.275375	0.274318	0.276125	0.275832	0.277211	0.277482	0.278672	0.279502	0.28057	0.282408	0.282906	0.284807	0.286088	0.288171	0.28834	0.291362	0.29209	0.292302	0.294742	0.297742	0.298675	0.301677	0.303325	0.306961
DMSO 10%	0.573346	0.566737	0.554896	0.53518	0.480591	0.463673	0.449314	0.441565	0.422637	0.400608	0.36118	0.336308	0.3203	0.3124	0.305777	0.301179	0.293757	0.290489	0.285447	0.2856	0.283217	0.284576	0.282819	0.284481	0.283295	0.285121	0.284267	0.286022	0.28599	0.287709	0.287928	0.289626	0.29057	0.292173	0.294328	0.295374	0.297661	0.299051	0.301489	0.302038	0.305268	0.306565	0.307001	0.309665	0.313312	0.314307	0.318002	0.319838	0.324132
DMSO 10%	0.632315	0.629595	0.614672	0.596096	0.534493	0.517318	0.499386	0.493468	0.47994	0.458418	0.420151	0.396095	0.380723	0.375032	0.370682	0.366982	0.361477	0.358817	0.354722	0.356038	0.353995	0.356244	0.355005	0.357843	0.357062	0.35965	0.359125	0.361752	0.362131	0.364374	0.365677	0.367578	0.369164	0.371587	0.374029	0.375689	0.378517	0.38014	0.383609	0.384641	0.3882	0.389793	0.39084	0.393936	0.398208	0.39953	0.403605	0.405751	0.410589
DMSO 10%	0.61453	0.608706	0.592991	0.573907	0.514838	0.496885	0.481239	0.47437	0.457151	0.430551	0.387667	0.3595	0.343527	0.336441	0.330221	0.325885	0.318809	0.316008	0.311401	0.311929	0.30978	0.311512	0.309945	0.312118	0.311162	0.313512	0.312857	0.315172	0.315406	0.317282	0.318355	0.31991	0.321265	0.3234	0.325775	0.326973	0.329778	0.331383	0.33423	0.335409	0.338852	0.340095	0.340867	0.343884	0.34775	0.349165	0.353095	0.355219	0.359451
DMSO 10%	0.636163	0.626382	0.620616	0.599317	0.542792	0.519925	0.503383	0.498632	0.479419	0.441094	0.386926	0.35604	0.33655	0.326705	0.318214	0.312868	0.303953	0.30013	0.294527	0.294153	0.291765	0.292375	0.290741	0.291899	0.290437	0.291522	0.290796	0.292082	0.291711	0.293216	0.293115	0.294185	0.295071	0.296209	0.298031	0.298248	0.300534	0.301552	0.303128	0.303956	0.30673	0.307287	0.307938	0.309899	0.312781	0.313553	0.316949	0.318424	0.321667
DMSO 0.5%	0.873069	0.868598	0.870026	0.852378	0.780997	0.756641	0.754659	0.757212	0.759755	0.775595	0.795831	0.813255	0.824496	0.83244	0.837837	0.84276	0.846295	0.851542	0.854645	0.859207	0.861756	0.865464	0.868809	0.873005	0.875627	0.878333	0.879652	0.882196	0.883865	0.886748	0.889086	0.891264	0.893119	0.89473	0.895869	0.897913	0.899999	0.901816	0.903153	0.904395	0.905167	0.905318	0.906058	0.907328	0.907897	0.908918	0.909602	0.910668	0.911865
DMSO 0.5%	0.847932	0.846816	0.835167	0.818973	0.749639	0.722586	0.721647	0.719938	0.724102	0.732482	0.74043	0.747822	0.754577	0.761096	0.765666	0.769393	0.771541	0.776237	0.779709	0.784287	0.787212	0.790828	0.794559	0.798168	0.800857	0.802667	0.804825	0.806519	0.808423	0.810103	0.812252	0.813498	0.815392	0.816232	0.817023	0.81854	0.820107	0.821899	0.82238	0.823635	0.823946	0.823864	0.82525	0.825173	0.825296	0.82624	0.826473	0.827493	0.827946
DMSO 0.5%	0.96406	0.967174	0.962631	0.942307	0.87457	0.854376	0.850356	0.848727	0.848531	0.856493	0.871083	0.893298	0.907661	0.92216	0.931531	0.941438	0.948972	0.956087	0.962713	0.967988	0.972016	0.977057	0.981368	0.985344	0.988624	0.991773	0.993622	0.995245	0.996879	0.997732	0.999187	1.00074	1.00026	1.00044	1.00005	0.99954	1.0011	0.999607	1.00011	0.998185	0.997064	0.995958	0.994573	0.993069	0.992231	0.990631	0.989654	0.988095	0.987273
DMSO 0.5%	0.88732	0.890794	0.877261	0.863055	0.791005	0.769052	0.76089	0.762123	0.759771	0.764417	0.775483	0.788903	0.802126	0.811452	0.816707	0.823907	0.829078	0.836382	0.841256	0.846264	0.850205	0.854488	0.858618	0.862862	0.865888	0.868587	0.870268	0.872589	0.874218	0.876354	0.878424	0.88033	0.881548	0.882807	0.883607	0.88454	0.886378	0.887559	0.888192	0.888765	0.888713	0.888988	0.88984	0.889863	0.890083	0.890131	0.890782	0.891172	0.891308
DMSO 0.5%	0.860897	0.858772	0.855661	0.829107	0.762333	0.74159	0.736765	0.734577	0.73722	0.738606	0.742883	0.751545	0.759405	0.768396	0.772145	0.77698	0.779701	0.78553	0.788951	0.793177	0.796786	0.799886	0.803538	0.806291	0.808727	0.810643	0.812137	0.813441	0.814742	0.816752	0.817692	0.819597	0.82002	0.820836	0.821752	0.822684	0.824152	0.825321	0.826091	0.826681	0.826647	0.826569	0.827625	0.828146	0.827897	0.828625	0.828375	0.828887	0.828891
DMSO 0.5%	0.892652	0.895441	0.885182	0.866278	0.800478	0.775582	0.768044	0.768905	0.774975	0.791104	0.809312	0.823528	0.83345	0.841602	0.846453	0.852793	0.858827	0.865747	0.870755	0.8763	0.879506	0.884559	0.887805	0.892139	0.894336	0.897505	0.898014	0.900836	0.902161	0.904481	0.905958	0.907872	0.908761	0.909453	0.910262	0.911373	0.913162	0.913839	0.914885	0.91489	0.915391	0.915662	0.915902	0.916505	0.916423	0.916742	0.9169	0.917469	0.917801
DMSO 0.5%	0.875085	0.8763	0.873949	0.850597	0.779589	0.756303	0.755786	0.752403	0.756531	0.76992	0.788481	0.804665	0.8154	0.824707	0.830842	0.835348	0.838176	0.842735	0.845094	0.848357	0.85093	0.854299	0.857278	0.860165	0.861973	0.863906	0.864494	0.866163	0.866878	0.868296	0.869228	0.870722	0.87135	0.871903	0.872374	0.873089	0.874785	0.875649	0.876354	0.876483	0.876912	0.876842	0.877345	0.877615	0.877454	0.878087	0.87828	0.879414	0.87889
DMSO 0.5%	0.888342	0.883719	0.878964	0.857379	0.789395	0.765834	0.759381	0.75833	0.763714	0.773382	0.786105	0.798788	0.808059	0.816274	0.821557	0.827112	0.831214	0.83747	0.842074	0.846615	0.85001	0.854323	0.858475	0.862402	0.865364	0.867924	0.869432	0.871738	0.873224	0.875038	0.876663	0.878471	0.879593	0.880069	0.880991	0.881978	0.883714	0.884819	0.885775	0.885763	0.885994	0.886114	0.886496	0.886769	0.886657	0.886621	0.886774	0.887323	0.887767
DMSO 0.5%	0.894161	0.888467	0.883522	0.866335	0.797399	0.769502	0.766706	0.764068	0.770085	0.786663	0.801369	0.815759	0.827513	0.835367	0.841008	0.846642	0.850511	0.856355	0.859818	0.864044	0.866803	0.870625	0.873587	0.87742	0.879314	0.881375	0.881881	0.884037	0.884973	0.886656	0.888146	0.889547	0.89017	0.891145	0.891491	0.892217	0.893933	0.895007	0.89574	0.895956	0.89636	0.896542	0.896915	0.897031	0.897002	0.897503	0.89769	0.89859	0.898117
EtOH	0.90054	0.903964	0.892401	0.873743	0.789813	0.759866	0.750873	0.749296	0.754221	0.762445	0.778257	0.791956	0.80372	0.812731	0.819598	0.826629	0.832244	0.838261	0.84341	0.848436	0.852884	0.857273	0.861003	0.865023	0.867719	0.870624	0.871907	0.874311	0.876118	0.878194	0.880251	0.882161	0.882951	0.884686	0.885874	0.886154	0.888811	0.889409	0.89056	0.89102	0.891598	0.89186	0.891953	0.892685	0.892945	0.89335	0.893253	0.894467	0.894939
EtOH	0.887473	0.881639	0.874026	0.849469	0.769717	0.736964	0.730503	0.730448	0.735809	0.744505	0.760374	0.773203	0.784433	0.793407	0.801177	0.807885	0.814085	0.820853	0.826148	0.831166	0.836555	0.840969	0.845328	0.850097	0.853078	0.856101	0.858144	0.86113	0.863228	0.865327	0.867196	0.869861	0.871136	0.872892	0.874115	0.874879	0.877264	0.878881	0.879537	0.880315	0.880349	0.881349	0.881838	0.882349	0.882835	0.883099	0.884193	0.884808	0.884828
EtOH	0.892016	0.892492	0.880923	0.860947	0.778091	0.747162	0.736446	0.735466	0.740443	0.748435	0.765116	0.778934	0.79093	0.800278	0.808152	0.815127	0.821212	0.827729	0.833635	0.838654	0.84396	0.849079	0.853339	0.858301	0.861246	0.865261	0.867234	0.870404	0.873028	0.875789	0.878499	0.88164	0.883292	0.885767	0.88813	0.889061	0.892332	0.893942	0.896157	0.897532	0.898722	0.8995	0.90062	0.902391	0.90348	0.904628	0.905527	0.907231	0.908488
EtOH	0.91149	0.909295	0.900559	0.887578	0.82223	0.801023	0.795172	0.794282	0.799008	0.807293	0.823536	0.837289	0.847825	0.856016	0.862121	0.867828	0.873292	0.877864	0.882647	0.88631	0.890676	0.894098	0.897849	0.901037	0.903272	0.905715	0.906681	0.908628	0.910134	0.911591	0.913791	0.9155	0.916462	0.917726	0.918478	0.918827	0.921444	0.922144	0.923815	0.924129	0.925003	0.925157	0.925193	0.925774	0.926218	0.926746	0.926696	0.927631	0.928185
EtOH	0.900579	0.89576	0.886253	0.869994	0.782487	0.755131	0.752632	0.753878	0.760588	0.770237	0.785289	0.798987	0.809676	0.818718	0.825861	0.831608	0.837284	0.842347	0.848051	0.851863	0.856609	0.860076	0.863834	0.867479	0.869899	0.873201	0.874057	0.876331	0.878053	0.879396	0.881487	0.883714	0.884483	0.886205	0.887359	0.887625	0.890446	0.891127	0.891821	0.892717	0.892884	0.893321	0.893639	0.894661	0.894797	0.89549	0.896338	0.897161	0.897827
EtOH	0.926109	0.922279	0.913166	0.896464	0.821968	0.801802	0.794649	0.79289	0.796634	0.806315	0.823174	0.837474	0.848639	0.856793	0.863822	0.869756	0.874882	0.880245	0.884686	0.889096	0.893038	0.896815	0.90021	0.903452	0.905858	0.90813	0.909237	0.91115	0.912701	0.914281	0.916096	0.917768	0.918374	0.919147	0.919133	0.919907	0.921474	0.921906	0.922713	0.923259	0.923142	0.923265	0.923182	0.923559	0.923379	0.923068	0.922817	0.923251	0.923792
EtOH	0.880483	0.881841	0.876585	0.852334	0.770353	0.735933	0.72452	0.722746	0.72642	0.734522	0.750032	0.76414	0.775933	0.785644	0.791976	0.799859	0.804967	0.811653	0.816164	0.821939	0.825502	0.830371	0.834362	0.838584	0.841602	0.84453	0.845739	0.848555	0.849481	0.852367	0.854548	0.856835	0.857793	0.859932	0.861632	0.862625	0.865167	0.866109	0.867557	0.868772	0.869554	0.870504	0.870717	0.872391	0.872783	0.8731	0.874454	0.876505	0.877406
EtOH	0.900821	0.894842	0.888698	0.865789	0.782333	0.76006	0.756343	0.754851	0.760231	0.769921	0.785838	0.800402	0.811446	0.819447	0.827042	0.832511	0.838573	0.843686	0.848755	0.852084	0.856742	0.860414	0.863659	0.867703	0.869495	0.872412	0.872837	0.875368	0.876869	0.877897	0.879392	0.881657	0.881442	0.882715	0.882836	0.882536	0.884878	0.884936	0.885485	0.885739	0.886162	0.885552	0.885265	0.885045	0.88512	0.884513	0.884151	0.884269	0.884398
EtOH	0.896645	0.895822	0.890349	0.872366	0.805776	0.783393	0.780303	0.779301	0.783047	0.791443	0.805513	0.817984	0.82698	0.834302	0.84005	0.844888	0.849379	0.854009	0.858248	0.861524	0.865272	0.868849	0.872124	0.875908	0.877471	0.880101	0.881317	0.883225	0.884951	0.886691	0.888893	0.891458	0.892018	0.893777	0.894893	0.895786	0.898422	0.899879	0.900846	0.902001	0.902721	0.903732	0.904387	0.905606	0.906641	0.907402	0.908315	0.909584	0.910884
DMSO	0.515196	0.509434	0.488321	0.465666	0.370101	0.326045	0.315506	0.306501	0.303311	0.300627	0.300953	0.299959	0.301351	0.30024	0.301979	0.301452	0.303336	0.303295	0.305241	0.305624	0.307428	0.308584	0.310479	0.311592	0.31319	0.314949	0.316045	0.3179	0.319794	0.321062	0.323568	0.325101	0.327568	0.330664	0.33194	0.334985	0.336643	0.340237	0.341547	0.345811	0.347694	0.349441	0.353283	0.358077	0.360104	0.364726	0.366688	0.371474	0.373732
DMSO	0.524812	0.520263	0.50414	0.47694	0.380841	0.334768	0.322226	0.312886	0.30868	0.305586	0.306021	0.305591	0.306525	0.305762	0.307563	0.307028	0.30858	0.308693	0.310237	0.31087	0.311952	0.313072	0.314118	0.315626	0.316337	0.317964	0.318583	0.320182	0.32142	0.322695	0.324232	0.325855	0.327177	0.329391	0.330513	0.332262	0.333846	0.336536	0.337342	0.340644	0.341887	0.343358	0.346364	0.350118	0.351513	0.355701	0.35701	0.361552	0.363515
DMSO	0.552962	0.547158	0.534902	0.507224	0.396451	0.341649	0.324499	0.313461	0.307747	0.30372	0.303181	0.302355	0.303285	0.30228	0.303747	0.30351	0.304716	0.305432	0.306763	0.30747	0.308567	0.309996	0.310908	0.312594	0.313241	0.314996	0.315797	0.317572	0.318752	0.320137	0.321746	0.323417	0.32466	0.327111	0.328212	0.330185	0.331601	0.334438	0.335364	0.338708	0.339973	0.341394	0.344659	0.348553	0.349783	0.354096	0.35555	0.360363	0.362008
DMSO	0.505848	0.501218	0.484127	0.461691	0.371798	0.327163	0.314786	0.30582	0.301888	0.298346	0.298488	0.297803	0.298613	0.297696	0.299456	0.299312	0.300603	0.300825	0.30236	0.303129	0.304543	0.305811	0.307213	0.308668	0.30999	0.311675	0.312813	0.314604	0.316206	0.317608	0.319907	0.32135	0.323579	0.326582	0.327971	0.330834	0.332523	0.336239	0.337458	0.341378	0.342743	0.344925	0.34881	0.353243	0.355262	0.35997	0.361837	0.366497	0.36885
DMSO	0.519026	0.513845	0.498833	0.474167	0.374337	0.32773	0.314333	0.305128	0.30022	0.297082	0.296832	0.296207	0.296912	0.296288	0.297688	0.29752	0.298844	0.2995	0.30076	0.301453	0.302332	0.303839	0.304657	0.306368	0.30717	0.308748	0.309477	0.311283	0.312373	0.313758	0.315282	0.31674	0.31826	0.320405	0.321408	0.323434	0.32483	0.327555	0.328574	0.331849	0.333022	0.334542	0.337693	0.341397	0.342897	0.347127	0.348649	0.352803	0.354812
DMSO	0.555633	0.550442	0.529796	0.501105	0.387753	0.33468	0.319613	0.309736	0.305092	0.301158	0.301025	0.300058	0.300918	0.300016	0.301743	0.301496	0.303018	0.303362	0.305134	0.306048	0.307784	0.309244	0.311316	0.312825	0.314686	0.316556	0.318229	0.320154	0.322483	0.323956	0.326874	0.328741	0.331709	0.335303	0.33702	0.340525	0.342264	0.346591	0.348223	0.352771	0.354674	0.357151	0.361973	0.366786	0.369363	0.374614	0.37689	0.381503	0.384055
DMSO	0.565223	0.560675	0.535589	0.504926	0.380717	0.327867	0.313418	0.302851	0.298707	0.295147	0.294813	0.293204	0.294498	0.29322	0.294661	0.294109	0.295636	0.295702	0.297599	0.298113	0.299997	0.30109	0.303227	0.304505	0.30642	0.307906	0.309853	0.311551	0.314056	0.314986	0.31815	0.319935	0.322795	0.326082	0.327473	0.331165	0.332528	0.33658	0.338062	0.342508	0.344277	0.346802	0.351167	0.355689	0.358201	0.362549	0.36499	0.369399	0.371582
Mannitol	0.900058	0.896204	0.894458	0.867801	0.802698	0.777835	0.772556	0.775601	0.780328	0.797082	0.81946	0.838046	0.850087	0.859931	0.868692	0.876179	0.881875	0.887474	0.892741	0.895846	0.900376	0.902655	0.906396	0.908533	0.911035	0.911785	0.912798	0.913438	0.914432	0.915167	0.915347	0.917123	0.916345	0.916254	0.916408	0.915438	0.916702	0.917137	0.916488	0.916411	0.916386	0.915407	0.914828	0.914487	0.913309	0.913161	0.912769	0.912648	0.912023
Mannitol	0.877739	0.870396	0.866633	0.848238	0.783701	0.756482	0.747771	0.747984	0.749639	0.747363	0.751655	0.758316	0.767235	0.774914	0.781996	0.790144	0.796068	0.803198	0.808752	0.812736	0.817662	0.820706	0.825294	0.827447	0.831068	0.832208	0.834166	0.834945	0.836844	0.83789	0.838925	0.840613	0.840378	0.841192	0.84138	0.84152	0.843309	0.843941	0.843792	0.844864	0.844591	0.844215	0.844392	0.844638	0.843547	0.844281	0.843968	0.844501	0.844555
Mannitol	0.932277	0.929744	0.924896	0.906076	0.838694	0.811293	0.806178	0.805997	0.801278	0.791788	0.792441	0.805999	0.821237	0.833845	0.843868	0.855899	0.865295	0.874602	0.881735	0.887488	0.893625	0.899144	0.90393	0.908931	0.912101	0.914704	0.916754	0.918491	0.919745	0.922663	0.922879	0.925648	0.925237	0.925732	0.925957	0.925044	0.927343	0.92647	0.926028	0.925305	0.925161	0.924451	0.923308	0.921783	0.920945	0.919459	0.918314	0.917498	0.916805
Mannitol	0.933374	0.931914	0.933982	0.913492	0.837249	0.816189	0.811949	0.814424	0.809691	0.793755	0.793807	0.805609	0.817002	0.829382	0.839667	0.853449	0.862773	0.872467	0.880296	0.885614	0.892651	0.898022	0.901997	0.907408	0.910557	0.913841	0.915642	0.917966	0.919226	0.920681	0.922098	0.92362	0.923398	0.923476	0.923459	0.922898	0.924444	0.924213	0.92431	0.922888	0.923008	0.922286	0.921266	0.920642	0.919902	0.918499	0.917781	0.916917	0.915847
Mannitol	0.908131	0.906125	0.904481	0.886961	0.814653	0.784922	0.778988	0.784078	0.790597	0.803454	0.82278	0.840974	0.852709	0.86161	0.869051	0.876773	0.882575	0.888336	0.894714	0.898754	0.902979	0.906449	0.909998	0.913206	0.91646	0.917805	0.919244	0.920993	0.921833	0.923785	0.924942	0.927129	0.926965	0.927911	0.929092	0.928816	0.930764	0.931776	0.932184	0.932776	0.933305	0.932764	0.932589	0.932977	0.932935	0.933433	0.933477	0.934522	0.933863
Mannitol	0.929408	0.930019	0.916483	0.906465	0.838012	0.807278	0.802816	0.807166	0.80369	0.788855	0.791464	0.803462	0.816302	0.830159	0.84137	0.853275	0.862947	0.871534	0.878849	0.884892	0.890909	0.896183	0.900854	0.905159	0.907812	0.910793	0.912368	0.914203	0.914897	0.916937	0.918055	0.919373	0.92002	0.919625	0.9202	0.919811	0.921574	0.921463	0.921458	0.920997	0.921791	0.921074	0.919897	0.919606	0.919002	0.918275	0.918264	0.918307	0.918088
Mannitol	0.943176	0.944251	0.942512	0.914841	0.848057	0.820405	0.815005	0.815008	0.817018	0.813281	0.825271	0.842691	0.860807	0.873081	0.885118	0.896449	0.904745	0.912606	0.920355	0.924178	0.929884	0.933563	0.937745	0.940701	0.943636	0.944923	0.946708	0.947228	0.947969	0.948476	0.948287	0.950274	0.948038	0.94818	0.947207	0.945908	0.947071	0.945771	0.945265	0.944795	0.943159	0.941922	0.941064	0.939202	0.937547	0.936385	0.935223	0.934482	0.932902
Mannitol	0.907044	0.908801	0.902884	0.887189	0.815842	0.785943	0.780463	0.783562	0.783964	0.785095	0.797418	0.809379	0.822296	0.832711	0.841534	0.850511	0.859089	0.866946	0.874391	0.877848	0.885061	0.888103	0.893309	0.895664	0.899445	0.90012	0.902375	0.903808	0.904538	0.906641	0.906658	0.909723	0.909262	0.909585	0.910808	0.909515	0.912085	0.912013	0.911975	0.91248	0.91235	0.911656	0.911421	0.910719	0.909954	0.909908	0.909423	0.909356	0.90811
Mannitol	0.916711	0.91563	0.915071	0.898805	0.823509	0.799634	0.79532	0.795874	0.798173	0.804884	0.819642	0.83407	0.847714	0.859195	0.868494	0.877978	0.885002	0.892867	0.898639	0.903121	0.907792	0.911697	0.915162	0.917233	0.919714	0.92109	0.922448	0.923099	0.924009	0.924968	0.924913	0.927054	0.92667	0.927044	0.927335	0.92697	0.92884	0.928864	0.928718	0.929043	0.929007	0.928037	0.928607	0.928437	0.927745	0.927191	0.927586	0.928153	0.926786
NaCl	0.908857	0.900256	0.891017	0.874927	0.806527	0.777322	0.772967	0.778304	0.782099	0.77825	0.784116	0.792519	0.802863	0.813088	0.821549	0.832616	0.84261	0.854293	0.863541	0.869514	0.876879	0.88187	0.887464	0.891616	0.895078	0.897457	0.899355	0.900996	0.902201	0.903643	0.90413	0.906494	0.906035	0.906382	0.906679	0.906809	0.908268	0.909022	0.909051	0.909333	0.909399	0.908931	0.908631	0.908379	0.9081	0.908165	0.90672	0.906914	0.906744
NaCl	0.90374	0.896031	0.894293	0.875437	0.80526	0.780188	0.770915	0.773799	0.775102	0.780866	0.791646	0.807038	0.819853	0.830659	0.838862	0.847171	0.854669	0.863593	0.869673	0.872229	0.877972	0.880398	0.885183	0.886784	0.889887	0.890455	0.891769	0.892423	0.893624	0.894948	0.894929	0.897412	0.896748	0.897784	0.898063	0.897747	0.900223	0.90042	0.900516	0.901597	0.901212	0.900391	0.901264	0.901183	0.900396	0.900847	0.90026	0.90056	0.899964
NaCl	0.891567	0.887329	0.876878	0.862519	0.793568	0.765699	0.76271	0.766852	0.773049	0.782843	0.798256	0.811539	0.820059	0.827191	0.832924	0.839704	0.846255	0.853954	0.859885	0.865	0.870054	0.874733	0.878444	0.882526	0.885281	0.888194	0.888891	0.891205	0.892007	0.894024	0.895604	0.89801	0.899037	0.900246	0.901694	0.902405	0.904947	0.906498	0.907709	0.90844	0.909498	0.909823	0.910417	0.911537	0.912204	0.913038	0.913532	0.914657	0.914941
NaCl	0.829503	0.819653	0.81894	0.799675	0.733836	0.701706	0.700245	0.693813	0.693074	0.678146	0.670109	0.670771	0.676116	0.682682	0.687066	0.692549	0.696251	0.703604	0.708153	0.712475	0.717732	0.720714	0.725205	0.727723	0.731428	0.732799	0.735016	0.736594	0.738824	0.740588	0.742708	0.74485	0.74648	0.74827	0.749335	0.75132	0.753289	0.756059	0.756927	0.759296	0.760067	0.760421	0.762409	0.764267	0.764542	0.766693	0.767083	0.769272	0.770174
NaCl	0.898901	0.892078	0.890413	0.869533	0.800864	0.775429	0.768923	0.771191	0.774724	0.774076	0.782524	0.792244	0.802784	0.811068	0.818862	0.826013	0.832499	0.84145	0.847664	0.851405	0.856851	0.860161	0.864907	0.866887	0.869738	0.870763	0.872059	0.872709	0.873509	0.874811	0.874878	0.876277	0.87571	0.87572	0.876068	0.875452	0.87699	0.877278	0.876865	0.877035	0.876249	0.875499	0.875499	0.874916	0.873719	0.873874	0.872788	0.87292	0.871407
NaCl	0.832628	0.826181	0.8181	0.803792	0.73508	0.708922	0.704138	0.704807	0.705097	0.699809	0.700352	0.704003	0.708138	0.714646	0.719677	0.727195	0.73329	0.741411	0.747256	0.75315	0.75772	0.762272	0.765899	0.770328	0.773443	0.776164	0.77785	0.780531	0.782395	0.784312	0.787405	0.788703	0.79091	0.792823	0.794062	0.796949	0.798529	0.801601	0.803147	0.804767	0.806047	0.806284	0.808419	0.810242	0.811061	0.813107	0.813542	0.815829	0.817041
[truncated: 76 more columns]

## Sheet: Temperature
	380	385	390	395	400	405	410	415	420	425	430	435	440	445	450	455	460	465	470	475	480	485	490	495	500	505	510	515	520	525	530	535	540	545	550	555	560	565	570	575	580	585	590	595	600	605	610	615	620
4°C	0.926532	0.923484	0.919216	0.902894	0.835932	0.808097	0.801764	0.801033	0.804755	0.812856	0.827415	0.842305	0.853355	0.861013	0.867746	0.873353	0.878303	0.882939	0.887199	0.890549	0.894048	0.897105	0.899667	0.902926	0.90442	0.907673	0.908191	0.910286	0.911363	0.9129	0.914255	0.915689	0.916135	0.917389	0.917885	0.918423	0.920424	0.921675	0.922366	0.923398	0.923672	0.924075	0.924587	0.925461	0.92576	0.926909	0.927232	0.928671	0.928619
4°C	0.905915	0.902778	0.902294	0.881112	0.815674	0.790246	0.785856	0.785802	0.788513	0.795791	0.8096	0.823319	0.833744	0.841261	0.847258	0.852436	0.857033	0.861593	0.865224	0.868643	0.871624	0.874479	0.877035	0.879984	0.881448	0.884203	0.884565	0.88656	0.887366	0.888848	0.889887	0.891563	0.891671	0.892675	0.893426	0.893199	0.89521	0.896114	0.896535	0.897896	0.898431	0.898394	0.898278	0.899003	0.899194	0.899709	0.900204	0.901008	0.901364
4°C	0.913473	0.90709	0.90287	0.882404	0.8225	0.799623	0.797522	0.79731	0.801753	0.808752	0.822705	0.835693	0.845665	0.852507	0.858571	0.863978	0.868588	0.872923	0.87685	0.879849	0.882921	0.886146	0.888665	0.8918	0.893394	0.896554	0.897374	0.89943	0.900172	0.901976	0.903363	0.90535	0.905886	0.907284	0.908104	0.908674	0.910889	0.912257	0.912999	0.914331	0.915064	0.91526	0.915945	0.917019	0.917913	0.919129	0.919159	0.920829	0.921363
4°C	0.912565	0.910951	0.903554	0.889251	0.818452	0.792562	0.787626	0.786796	0.789647	0.798114	0.813093	0.827642	0.838596	0.84682	0.85403	0.859438	0.864207	0.869196	0.872691	0.876522	0.8794	0.882427	0.885127	0.888478	0.889369	0.891953	0.892386	0.894405	0.895104	0.89625	0.897396	0.899165	0.898656	0.899564	0.900332	0.900261	0.902167	0.902721	0.903263	0.904071	0.904424	0.904491	0.904613	0.905614	0.905498	0.90578	0.905627	0.907183	0.906895
4°C	0.915232	0.90787	0.902965	0.885652	0.819374	0.789464	0.784008	0.782975	0.78589	0.793956	0.808642	0.824104	0.83593	0.84457	0.851476	0.858088	0.863201	0.868646	0.873048	0.876913	0.879995	0.884052	0.886874	0.890606	0.892167	0.895262	0.895995	0.898007	0.898528	0.900313	0.901312	0.903239	0.903565	0.905069	0.905115	0.90549	0.907442	0.90893	0.909724	0.910924	0.91109	0.911132	0.911518	0.912451	0.913003	0.913674	0.913601	0.915256	0.91536
4°C	0.898311	0.895919	0.89031	0.866558	0.79664	0.773106	0.770531	0.769886	0.774205	0.783237	0.798634	0.812633	0.823716	0.831297	0.838451	0.843623	0.849135	0.853317	0.858033	0.860841	0.865601	0.868111	0.871778	0.874823	0.876705	0.879846	0.881072	0.883392	0.884812	0.886419	0.888606	0.89125	0.891431	0.893366	0.89432	0.894915	0.898099	0.89884	0.900017	0.901161	0.902572	0.903052	0.903468	0.904948	0.905678	0.906504	0.906706	0.908592	0.909213
4°C	0.914194	0.910396	0.907254	0.88549	0.81588	0.792637	0.790552	0.789922	0.794534	0.802961	0.817426	0.831206	0.841469	0.849706	0.856083	0.861289	0.866608	0.870958	0.875517	0.878642	0.882723	0.885575	0.889248	0.892472	0.894276	0.897646	0.898659	0.901076	0.902533	0.904195	0.906021	0.908273	0.90886	0.910605	0.910968	0.911841	0.914141	0.915694	0.916267	0.917422	0.918694	0.918986	0.919686	0.920989	0.921405	0.922267	0.922751	0.923748	0.924787
13°C	0.897517	0.892659	0.887329	0.867806	0.804373	0.780414	0.776703	0.776845	0.780733	0.787911	0.802642	0.815562	0.825419	0.832647	0.839182	0.844637	0.849533	0.854076	0.857732	0.861533	0.86493	0.868306	0.871178	0.874474	0.876043	0.879228	0.880104	0.882802	0.883685	0.885507	0.887426	0.889566	0.890204	0.892151	0.892998	0.894028	0.896864	0.898268	0.900029	0.901218	0.902195	0.902769	0.903392	0.9052	0.906075	0.908065	0.908845	0.910786	0.911756
13°C	0.904039	0.901288	0.898466	0.880592	0.818694	0.797658	0.79561	0.796327	0.800333	0.808072	0.822381	0.835061	0.84495	0.851872	0.857883	0.862413	0.86694	0.871261	0.874981	0.87835	0.881359	0.884553	0.887183	0.890281	0.891772	0.894598	0.895134	0.897112	0.898045	0.899722	0.900883	0.902384	0.902683	0.903752	0.904293	0.904705	0.906588	0.907746	0.908026	0.909056	0.909613	0.909642	0.9104	0.91102	0.91063	0.911975	0.912275	0.913834	0.914292
13°C	0.899874	0.899836	0.895433	0.872807	0.797641	0.773711	0.770021	0.770303	0.774642	0.781662	0.795112	0.807509	0.817126	0.823783	0.829957	0.834324	0.839393	0.843302	0.847371	0.85013	0.853815	0.856483	0.858959	0.862541	0.863347	0.866086	0.866472	0.868637	0.869621	0.871196	0.87235	0.873955	0.87374	0.875215	0.875988	0.875957	0.878143	0.878731	0.878991	0.880611	0.881008	0.880945	0.881293	0.881778	0.88262	0.88309	0.88306	0.884707	0.885065
13°C	0.869241	0.864507	0.863567	0.844528	0.782331	0.759909	0.754657	0.75499	0.758263	0.764784	0.778648	0.792041	0.801803	0.809528	0.815886	0.821823	0.826642	0.831878	0.836052	0.840465	0.844333	0.848072	0.851209	0.855262	0.857182	0.861028	0.86213	0.86533	0.86675	0.868945	0.871022	0.873461	0.874596	0.876696	0.87802	0.878926	0.881688	0.883433	0.884734	0.886501	0.888016	0.888371	0.889486	0.891554	0.892053	0.893484	0.894694	0.896251	0.897426
13°C	0.903264	0.900086	0.896411	0.877388	0.803807	0.77844	0.774683	0.773877	0.777008	0.784285	0.797728	0.810125	0.820507	0.827624	0.833612	0.839142	0.84359	0.848362	0.851996	0.856257	0.858932	0.862503	0.864908	0.868127	0.869691	0.872619	0.873437	0.875786	0.876691	0.878292	0.879429	0.881333	0.881971	0.88275	0.883049	0.883536	0.885785	0.886705	0.887535	0.888321	0.889524	0.889174	0.889584	0.89039	0.89141	0.891645	0.892439	0.894252	0.894063
13°C	0.900105	0.901537	0.893472	0.877659	0.812381	0.790661	0.788213	0.788702	0.792703	0.801044	0.815493	0.828992	0.839032	0.846251	0.852103	0.857608	0.862089	0.866914	0.870451	0.874214	0.876899	0.880123	0.882918	0.886159	0.887644	0.890539	0.891577	0.893445	0.894489	0.896125	0.897239	0.899283	0.899794	0.901036	0.901683	0.903168	0.905238	0.906857	0.907594	0.90889	0.909738	0.910038	0.910393	0.912132	0.91282	0.913824	0.914831	0.916243	0.91704
13°C	0.892646	0.890886	0.886894	0.870475	0.800598	0.779909	0.776006	0.776158	0.781008	0.78797	0.801855	0.814634	0.825145	0.831926	0.837044	0.842868	0.847658	0.852695	0.856546	0.861149	0.864418	0.868751	0.872016	0.875488	0.878206	0.881354	0.883623	0.886307	0.888052	0.890478	0.892711	0.895105	0.897213	0.899486	0.901189	0.903467	0.906022	0.908277	0.90994	0.911625	0.91355	0.914326	0.916411	0.917836	0.919872	0.920459	0.921491	0.923247	0.924162
20°C	0.852511	0.853985	0.845527	0.822263	0.755897	0.724774	0.715662	0.714097	0.715779	0.720731	0.733363	0.744785	0.753835	0.761383	0.766543	0.773233	0.777568	0.783712	0.787101	0.792911	0.795517	0.800634	0.802968	0.807781	0.810287	0.813522	0.815846	0.818542	0.819814	0.822877	0.824133	0.826432	0.828239	0.829711	0.831371	0.833103	0.835193	0.837556	0.838273	0.840169	0.840776	0.84215	0.843431	0.844939	0.846219	0.847925	0.848774	0.850597	0.850703
20°C	0.869265	0.873539	0.862361	0.840964	0.772442	0.744526	0.737701	0.736609	0.738296	0.744185	0.756707	0.7678	0.77638	0.783489	0.788441	0.794877	0.798965	0.804697	0.807805	0.81307	0.814993	0.819472	0.821844	0.826172	0.828106	0.830774	0.832677	0.835211	0.836356	0.838947	0.839573	0.841468	0.842296	0.843403	0.844134	0.846107	0.847785	0.849356	0.85008	0.851286	0.851744	0.851639	0.852816	0.853926	0.854875	0.856249	0.856964	0.857838	0.857996
20°C	0.852105	0.846961	0.844588	0.825975	0.761763	0.731749	0.72128	0.718533	0.719902	0.723603	0.736272	0.746701	0.75576	0.763045	0.768126	0.77516	0.779483	0.786022	0.789389	0.795133	0.798085	0.803553	0.806407	0.811537	0.814	0.81796	0.820066	0.823526	0.824803	0.828587	0.829873	0.832942	0.834763	0.836434	0.8388	0.840221	0.842891	0.845107	0.847358	0.848701	0.849815	0.850643	0.852026	0.853876	0.854102	0.856748	0.857353	0.858476	0.859608
20°C	0.879552	0.887489	0.875729	0.856157	0.786899	0.75944	0.75233	0.750306	0.752923	0.759038	0.772091	0.782786	0.792614	0.799926	0.805104	0.811051	0.815506	0.821308	0.824753	0.829457	0.832236	0.836396	0.839469	0.842986	0.844984	0.848128	0.849242	0.851975	0.852433	0.854998	0.856004	0.857843	0.858732	0.859387	0.86056	0.860672	0.862482	0.86346	0.864171	0.864923	0.865328	0.864994	0.865048	0.865389	0.865418	0.866195	0.866397	0.867338	0.866941
20°C	0.892324	0.888608	0.884901	0.865417	0.792865	0.764221	0.756864	0.75618	0.759648	0.765513	0.779592	0.791523	0.801112	0.80866	0.813308	0.820196	0.824257	0.82992	0.833239	0.838355	0.841286	0.84595	0.848453	0.85305	0.855412	0.858844	0.860912	0.863523	0.865043	0.867553	0.86918	0.871412	0.873512	0.875311	0.876772	0.879024	0.881627	0.884006	0.885671	0.887159	0.888434	0.889504	0.891319	0.893151	0.894995	0.896687	0.897804	0.899293	0.900125
20°C	0.874113	0.875369	0.865068	0.847432	0.779787	0.752216	0.746285	0.7457	0.747917	0.753763	0.767034	0.778359	0.787687	0.794181	0.79993	0.805183	0.809874	0.814768	0.818511	0.822392	0.825166	0.829351	0.831604	0.835728	0.837535	0.840538	0.8417	0.844103	0.844922	0.847425	0.848821	0.851151	0.851713	0.853147	0.854185	0.855621	0.857522	0.859249	0.860562	0.862013	0.862695	0.863458	0.863904	0.8651	0.86596	0.868022	0.868967	0.870169	0.871698
20°C	0.880668	0.878395	0.869162	0.851827	0.78023	0.753106	0.747995	0.747781	0.751205	0.757111	0.771143	0.783389	0.791731	0.799444	0.80493	0.811291	0.815451	0.821298	0.824715	0.829905	0.83267	0.837219	0.840466	0.844665	0.84762	0.851055	0.853112	0.856345	0.85737	0.860545	0.862689	0.865199	0.867124	0.869392	0.871063	0.873347	0.875456	0.87791	0.879425	0.881623	0.882892	0.883423	0.885608	0.887098	0.88845	0.890184	0.891202	0.892899	0.89347
20°C	0.879003	0.8815	0.874612	0.851976	0.78438	0.758164	0.755336	0.755141	0.758006	0.766239	0.780392	0.792354	0.801459	0.809635	0.815052	0.820582	0.824588	0.829913	0.833125	0.837048	0.84004	0.843865	0.846768	0.850926	0.852852	0.855887	0.857319	0.860255	0.861582	0.864109	0.865704	0.867779	0.868855	0.870861	0.871911	0.873055	0.875661	0.877358	0.878582	0.880346	0.881538	0.882023	0.88296	0.884756	0.884982	0.88673	0.887858	0.889249	0.890323
20°C	0.879261	0.885783	0.877654	0.8557	0.781329	0.753822	0.749149	0.748655	0.751733	0.758813	0.772178	0.784499	0.793715	0.801692	0.807413	0.813355	0.817618	0.82258	0.82647	0.830726	0.833999	0.837395	0.840585	0.844269	0.846514	0.849347	0.850868	0.85349	0.855267	0.857408	0.85924	0.861902	0.862547	0.864321	0.865888	0.866634	0.869487	0.870276	0.871859	0.873049	0.874365	0.875183	0.875754	0.877517	0.878387	0.879557	0.879984	0.881899	0.882669
20°C	0.899737	0.894664	0.891274	0.868499	0.789773	0.761321	0.757064	0.755037	0.757673	0.765839	0.780455	0.793635	0.803611	0.812249	0.818816	0.824497	0.830053	0.835051	0.839269	0.842966	0.8472	0.850486	0.853771	0.857416	0.859356	0.862687	0.864093	0.866606	0.868283	0.870316	0.872106	0.875041	0.875522	0.877076	0.878461	0.879276	0.881863	0.882967	0.883865	0.885085	0.886309	0.887331	0.887971	0.889116	0.890013	0.890876	0.891067	0.892893	0.893732
27°C	0.823046	0.822304	0.816594	0.796625	0.732858	0.707504	0.702776	0.70056	0.701141	0.705916	0.718235	0.728208	0.737133	0.744654	0.752858	0.759716	0.764313	0.769032	0.771992	0.775398	0.778105	0.781222	0.783061	0.786209	0.786975	0.789779	0.790036	0.792133	0.793132	0.795214	0.796476	0.798084	0.797507	0.798585	0.799274	0.80049	0.802959	0.804522	0.805409	0.80678	0.806861	0.806616	0.807112	0.807887	0.808311	0.810995	0.812578	0.814942	0.815123
27°C	0.807893	0.802886	0.798821	0.774329	0.706391	0.675719	0.6657	0.661013	0.660905	0.66422	0.677254	0.687951	0.6972	0.70642	0.714933	0.72377	0.728047	0.734286	0.737601	0.743145	0.74467	0.749284	0.751041	0.75537	0.757194	0.760286	0.761577	0.764353	0.765113	0.768481	0.769822	0.772263	0.773092	0.774037	0.776155	0.777233	0.780119	0.78119	0.783176	0.784679	0.785045	0.785511	0.785829	0.7867	0.787791	0.790096	0.791608	0.794167	0.794861
27°C	0.815763	0.809966	0.805237	0.783587	0.7173	0.689587	0.684019	0.681236	0.681255	0.685755	0.698339	0.708809	0.717343	0.725354	0.734222	0.742125	0.745901	0.750826	0.753409	0.75774	0.75959	0.763491	0.76486	0.768763	0.77	0.772764	0.773532	0.775929	0.776662	0.779677	0.781135	0.782843	0.783016	0.783558	0.785607	0.787405	0.790244	0.792079	0.793694	0.794882	0.795531	0.795582	0.796173	0.798049	0.798802	0.801807	0.803992	0.806416	0.808327
27°C	0.806962	0.800093	0.794516	0.776829	0.705308	0.676672	0.671311	0.668291	0.66905	0.672898	0.686005	0.697026	0.706449	0.714752	0.724007	0.731365	0.736413	0.741228	0.744765	0.748302	0.750786	0.753982	0.756079	0.759401	0.760754	0.763579	0.763752	0.766252	0.766739	0.769315	0.770771	0.773184	0.772622	0.773751	0.774879	0.77547	0.777944	0.779907	0.780344	0.781506	0.78232	0.782551	0.782593	0.78274	0.783014	0.785837	0.786653	0.788925	0.789857
27°C	0.830366	0.827895	0.825409	0.804554	0.729876	0.699435	0.693619	0.69107	0.690648	0.694753	0.706314	0.716772	0.725232	0.73308	0.740909	0.748418	0.752854	0.757824	0.76069	0.764582	0.766942	0.770349	0.772221	0.775871	0.776836	0.779839	0.780546	0.783258	0.784136	0.786789	0.788277	0.790497	0.790177	0.790821	0.7927	0.793156	0.795468	0.797175	0.797791	0.798948	0.799466	0.799407	0.799515	0.799918	0.800183	0.80214	0.80262	0.80566	0.805796
27°C	0.822025	0.821372	0.81404	0.794026	0.71552	0.689498	0.685551	0.683386	0.68426	0.68831	0.700744	0.710051	0.719034	0.725929	0.733868	0.740505	0.744709	0.749261	0.75228	0.756031	0.758438	0.762256	0.764222	0.76711	0.768656	0.771411	0.772126	0.774499	0.775549	0.77743	0.779657	0.780949	0.781632	0.782362	0.783751	0.785052	0.787214	0.78978	0.789971	0.792006	0.79177	0.792075	0.793833	0.795217	0.796586	0.798788	0.800599	0.803036	0.803514
27°C	0.847509	0.841718	0.836918	0.818974	0.748041	0.715585	0.707308	0.703536	0.703329	0.706902	0.720234	0.730992	0.740122	0.748607	0.75733	0.765081	0.770286	0.775286	0.778598	0.782934	0.78538	0.789543	0.79169	0.795331	0.79681	0.799739	0.800676	0.803367	0.804821	0.807079	0.808635	0.81141	0.811003	0.811826	0.813642	0.814885	0.81799	0.819614	0.820908	0.822556	0.822802	0.822842	0.823435	0.823928	0.824837	0.827606	0.829779	0.83223	0.832998
27°C	0.877153	0.873692	0.867028	0.842894	0.769314	0.736777	0.730829	0.727264	0.728205	0.733606	0.746587	0.757899	0.767146	0.775624	0.784562	0.792715	0.798216	0.80346	0.806864	0.810757	0.813835	0.81734	0.819616	0.823264	0.82442	0.827364	0.828154	0.830511	0.831662	0.834083	0.835714	0.837624	0.837155	0.838337	0.839302	0.840169	0.842718	0.844052	0.845432	0.846441	0.847093	0.846867	0.846829	0.846963	0.847052	0.848962	0.850381	0.852632	0.852994
27°C	0.8312	0.828573	0.822968	0.799111	0.733073	0.704667	0.699223	0.695666	0.695666	0.699354	0.710879	0.720397	0.728048	0.735963	0.743102	0.750637	0.754995	0.759997	0.763125	0.767237	0.769643	0.773763	0.775532	0.779121	0.780964	0.784079	0.785184	0.787877	0.789331	0.792224	0.793596	0.7965	0.79649	0.7979	0.799673	0.800572	0.803176	0.804891	0.805945	0.807016	0.807639	0.808196	0.808415	0.808825	0.809534	0.811396	0.812786	0.814577	0.81497
27°C	0.836504	0.833085	0.829307	0.81095	0.75056	0.72841	0.725242	0.723013	0.723697	0.728884	0.742764	0.753136	0.761923	0.769398	0.777983	0.784878	0.789707	0.794016	0.796948	0.800575	0.802473	0.805966	0.807784	0.810864	0.811791	0.814211	0.814494	0.816759	0.817412	0.819559	0.820724	0.822396	0.822337	0.822671	0.823833	0.824887	0.827201	0.828746	0.829306	0.830505	0.830325	0.830624	0.830557	0.830685	0.831669	0.833652	0.83438	0.837647	0.838016
30°C	0.845694	0.847729	0.83986	0.823862	0.752828	0.725564	0.718092	0.717791	0.709606	0.700031	0.699277	0.712843	0.725037	0.734073	0.739019	0.744344	0.746397	0.750247	0.753522	0.759428	0.765934	0.771396	0.775562	0.779694	0.78233	0.785383	0.787946	0.790121	0.792295	0.79461	0.796848	0.79902	0.80072	0.803735	0.805398	0.807666	0.810363	0.812397	0.813293	0.815461	0.817181	0.817673	0.819548	0.82188	0.822694	0.824009	0.824831	0.826446	0.826964
30°C	0.815709	0.817133	0.807143	0.792268	0.721845	0.697466	0.687078	0.689739	0.690967	0.690704	0.704507	0.717886	0.728958	0.734695	0.737568	0.740772	0.742646	0.744776	0.746544	0.751737	0.759675	0.764105	0.768354	0.771268	0.774253	0.775665	0.778093	0.779817	0.781407	0.783979	0.785007	0.787649	0.789363	0.791456	0.793911	0.79561	0.798922	0.801156	0.80171	0.804289	0.805887	0.806779	0.809566	0.811606	0.812565	0.81504	0.815092	0.817293	0.817623
30°C	0.836821	0.838975	0.827503	0.810854	0.74041	0.714693	0.707514	0.704791	0.702356	0.702982	0.719177	0.736806	0.750633	0.758071	0.761472	0.764907	0.766232	0.767948	0.768753	0.773026	0.780264	0.784429	0.788238	0.789983	0.791871	0.792233	0.793872	0.795051	0.795631	0.797507	0.797852	0.800266	0.800597	0.801814	0.803431	0.804832	0.807891	0.80896	0.809811	0.811661	0.812467	0.813323	0.815567	0.816666	0.817373	0.819485	0.819817	0.820954	0.821026
30°C	0.843652	0.852404	0.838049	0.817552	0.748712	0.727299	0.715253	0.713375	0.709733	0.70174	0.706121	0.72058	0.73344	0.74155	0.745573	0.750102	0.753595	0.756555	0.759497	0.765386	0.774016	0.779502	0.784382	0.787807	0.791142	0.793082	0.796191	0.797872	0.799636	0.802199	0.803483	0.806342	0.807865	0.81019	0.81208	0.813982	0.816654	0.818893	0.819621	0.822043	0.823199	0.82402	0.826355	0.828324	0.829234	0.831438	0.831927	0.833686	0.834431
30°C	0.830055	0.83093	0.827089	0.811965	0.737439	0.714769	0.705519	0.703874	0.706795	0.707688	0.720773	0.736807	0.747535	0.753929	0.757118	0.760296	0.762027	0.763368	0.765027	0.770007	0.778272	0.783433	0.787415	0.789945	0.792227	0.794059	0.795561	0.797747	0.799001	0.801471	0.802676	0.805527	0.807041	0.80916	0.811759	0.813602	0.817019	0.819666	0.820507	0.822628	0.824844	0.825945	0.828383	0.831301	0.832657	0.835166	0.835965	0.837786	0.838863
30°C	0.832226	0.836106	0.828113	0.802955	0.737288	0.714058	0.704849	0.704032	0.707207	0.711341	0.725267	0.738261	0.746912	0.752084	0.7552	0.758945	0.761649	0.764694	0.767229	0.773538	0.782437	0.788541	0.793189	0.796479	0.799252	0.801053	0.803012	0.805407	0.806862	0.809116	0.811018	0.813834	0.815304	0.817789	0.820631	0.822677	0.826303	0.828851	0.83017	0.83264	0.835079	0.836433	0.839386	0.842249	0.843621	0.8466	0.847608	0.850043	0.85078
30°C	0.821828	0.824421	0.811618	0.793111	0.72486	0.698046	0.689667	0.687003	0.688441	0.688427	0.6965	0.709834	0.720256	0.72709	0.729964	0.733707	0.735431	0.739393	0.741893	0.7466	0.754144	0.759197	0.763621	0.765822	0.769051	0.770377	0.772764	0.774182	0.776085	0.778227	0.779476	0.78243	0.783844	0.786019	0.788419	0.790669	0.793929	0.796454	0.797451	0.800073	0.802096	0.803102	0.805819	0.808771	0.809468	0.812673	0.813759	0.81588	0.816333
30°C	0.817492	0.817147	0.805797	0.791004	0.723026	0.697111	0.688059	0.686216	0.688764	0.688337	0.701674	0.71493	0.72356	0.730624	0.732749	0.736073	0.73721	0.739795	0.741415	0.746704	0.754434	0.759856	0.763981	0.766837	0.769581	0.771219	0.773494	0.775114	0.776491	0.779213	0.78019	0.782639	0.78431	0.786358	0.788547	0.790661	0.793664	0.796137	0.796673	0.799157	0.800955	0.801696	0.804549	0.806688	0.807541	0.810186	0.81067	0.812631	0.812519
30°C	0.820074	0.821698	0.816345	0.799071	0.730172	0.703417	0.694244	0.697316	0.698119	0.701948	0.71882	0.734924	0.743182	0.748163	0.748587	0.750779	0.751236	0.751825	0.753522	0.757713	0.764846	0.769712	0.773066	0.775509	0.777893	0.778975	0.780939	0.782732	0.78387	0.786219	0.787349	0.790109	0.791545	0.793867	0.79612	0.79861	0.801441	0.804078	0.805158	0.808074	0.809828	0.810843	0.813552	0.816387	0.81783	0.82037	0.820938	0.823315	0.8238
[truncated: 76 more columns]

## Sheet: Salinity
	380	385	390	395	400	405	410	415	420	425	430	435	440	445	450	455	460	465	470	475	480	485	490	495	500	505	510	515	520	525	530	535	540	545	550	555	560	565	570	575	580	585	590	595	600	605	610	615	620
0 ppt	0.744147	0.736967	0.731324	0.711538	0.646022	0.619123	0.611913	0.608802	0.60834	0.607577	0.610606	0.616647	0.621962	0.625508	0.627058	0.626308	0.619894	0.616975	0.614486	0.615467	0.616278	0.61797	0.619501	0.621405	0.622925	0.624628	0.626673	0.628365	0.630656	0.632573	0.635614	0.637883	0.641191	0.644843	0.647093	0.650451	0.653277	0.657104	0.659544	0.663669	0.666163	0.668302	0.671279	0.674306	0.676601	0.680149	0.682595	0.686923	0.689739
0 ppt	0.756817	0.751091	0.747058	0.723556	0.65714	0.631336	0.618856	0.616636	0.60879	0.598244	0.589423	0.595346	0.601505	0.607035	0.609611	0.61017	0.604706	0.602394	0.600148	0.600741	0.602136	0.604233	0.60552	0.607748	0.609187	0.611123	0.613153	0.614726	0.617047	0.619154	0.621638	0.624319	0.626605	0.630109	0.632402	0.63463	0.637595	0.640541	0.642448	0.64617	0.64884	0.650491	0.652687	0.655017	0.657143	0.659803	0.662128	0.665609	0.668104
0 ppt	0.719779	0.715451	0.714073	0.688284	0.62404	0.598356	0.587907	0.584566	0.57707	0.574939	0.573081	0.578899	0.583371	0.587637	0.589917	0.589115	0.582851	0.580122	0.577457	0.578096	0.578744	0.580278	0.581809	0.583476	0.584987	0.586132	0.58823	0.5895	0.592083	0.59371	0.596766	0.599181	0.602047	0.606012	0.60814	0.611367	0.614235	0.617746	0.620278	0.624346	0.627182	0.628978	0.631942	0.635101	0.637165	0.640705	0.643202	0.647228	0.650097
0 ppt	0.74087	0.735704	0.729532	0.712243	0.639255	0.614175	0.600432	0.594817	0.584283	0.564162	0.543309	0.545395	0.548927	0.553587	0.555727	0.557034	0.552112	0.550657	0.548464	0.549484	0.550383	0.553035	0.554439	0.55714	0.558544	0.560937	0.562751	0.56499	0.566994	0.569589	0.571683	0.575	0.57687	0.580697	0.583329	0.585374	0.588787	0.591124	0.593749	0.596831	0.599774	0.601623	0.603191	0.605672	0.608393	0.610915	0.61376	0.616783	0.61979
0 ppt	0.749088	0.741876	0.736066	0.717397	0.648936	0.623565	0.612005	0.608912	0.609056	0.610214	0.615156	0.623161	0.629244	0.634425	0.636035	0.635414	0.629116	0.62592	0.623456	0.624132	0.624989	0.626646	0.627872	0.629813	0.631316	0.6329	0.634862	0.636505	0.638791	0.640663	0.643627	0.646129	0.649254	0.653106	0.655284	0.658579	0.661843	0.665186	0.667753	0.671917	0.674752	0.676768	0.679638	0.682832	0.685063	0.688582	0.691446	0.695497	0.698333
0 ppt	0.722179	0.717232	0.713444	0.695113	0.627476	0.604589	0.59118	0.591192	0.591023	0.59032	0.594708	0.599874	0.605251	0.609361	0.610674	0.610361	0.603806	0.60123	0.598773	0.599872	0.600407	0.60219	0.603729	0.60572	0.607105	0.609054	0.61078	0.612709	0.6149	0.616815	0.619942	0.622134	0.625308	0.629009	0.631276	0.634863	0.637455	0.64131	0.643832	0.647785	0.650506	0.652676	0.655647	0.658792	0.661074	0.664578	0.667275	0.671424	0.674522
0 ppt	0.752693	0.745197	0.742204	0.719196	0.648766	0.624564	0.612777	0.612177	0.601038	0.585889	0.575517	0.579275	0.584678	0.590056	0.592416	0.593305	0.588272	0.58653	0.584594	0.585794	0.587088	0.589752	0.591431	0.594146	0.59569	0.597826	0.5998	0.601985	0.604299	0.606655	0.609316	0.611938	0.614356	0.618134	0.620729	0.623235	0.626493	0.629331	0.631628	0.635295	0.638137	0.639954	0.642103	0.644846	0.647237	0.649815	0.652738	0.655967	0.658891
0 ppt	0.737154	0.732005	0.72712	0.702213	0.638385	0.613738	0.602718	0.60105	0.594202	0.595183	0.601938	0.609714	0.61668	0.621969	0.624482	0.624019	0.617642	0.614711	0.61222	0.612761	0.613299	0.614734	0.616074	0.617681	0.618847	0.620271	0.62197	0.623238	0.62554	0.627337	0.630479	0.632667	0.635635	0.639199	0.641266	0.644643	0.647393	0.650964	0.653316	0.65743	0.660072	0.66187	0.664716	0.667647	0.669839	0.673337	0.675725	0.679849	0.682431
0 ppt	0.762107	0.754941	0.750147	0.727415	0.660233	0.636036	0.619445	0.616645	0.607683	0.597794	0.591766	0.594809	0.600665	0.60557	0.607947	0.608611	0.603587	0.601259	0.598915	0.599879	0.600604	0.603219	0.604662	0.607015	0.608661	0.610998	0.612529	0.614756	0.617009	0.619247	0.62164	0.62484	0.626878	0.630575	0.633164	0.635465	0.638774	0.641697	0.644281	0.647357	0.650809	0.652437	0.654285	0.657046	0.659689	0.662431	0.665016	0.668705	0.671388
0 ppt	0.730856	0.722293	0.717138	0.692958	0.630214	0.60303	0.589959	0.586722	0.584218	0.580357	0.577572	0.582486	0.587516	0.591947	0.593672	0.593698	0.587352	0.585241	0.582805	0.583754	0.584544	0.58657	0.587972	0.590113	0.591548	0.593377	0.595108	0.596765	0.599113	0.600911	0.603787	0.606015	0.608711	0.61223	0.614358	0.617232	0.619887	0.623276	0.625556	0.629051	0.631862	0.633747	0.636258	0.639082	0.641435	0.644511	0.647057	0.650985	0.653673
8 ppt	0.769555	0.762002	0.750126	0.733422	0.64772	0.61016	0.600663	0.598017	0.600011	0.601802	0.607227	0.611317	0.617279	0.622226	0.626948	0.632342	0.636514	0.641602	0.645344	0.650673	0.653953	0.659218	0.662342	0.667543	0.67059	0.674972	0.677705	0.682327	0.685092	0.688995	0.691936	0.695365	0.698698	0.702887	0.705703	0.709384	0.711972	0.715673	0.71785	0.72187	0.724032	0.725978	0.729991	0.734099	0.73666	0.74042	0.742679	0.74576	0.747952
8 ppt	0.777246	0.770419	0.762573	0.748606	0.678276	0.645301	0.638185	0.63635	0.638179	0.640796	0.64586	0.650539	0.655928	0.66082	0.665299	0.670111	0.673911	0.678787	0.682056	0.686337	0.688729	0.693404	0.695835	0.700352	0.702247	0.706704	0.708313	0.712563	0.714342	0.718191	0.720022	0.723835	0.725101	0.728341	0.731145	0.732695	0.735531	0.737044	0.739318	0.741557	0.743552	0.744623	0.746495	0.748981	0.7502	0.752712	0.754412	0.757552	0.758877
8 ppt	0.769775	0.768709	0.757705	0.7387	0.662213	0.628408	0.623297	0.621927	0.624697	0.62825	0.634911	0.640533	0.646796	0.651825	0.657656	0.662454	0.667175	0.672238	0.675943	0.680601	0.684114	0.688538	0.692261	0.696793	0.699155	0.704281	0.706144	0.711124	0.713465	0.717582	0.720379	0.724198	0.725928	0.730321	0.733287	0.735525	0.738917	0.741377	0.743541	0.746665	0.748929	0.75008	0.752707	0.756097	0.757934	0.761581	0.763204	0.766727	0.769282
8 ppt	0.76145	0.756174	0.750954	0.728954	0.65525	0.622994	0.617396	0.616238	0.618526	0.621428	0.627931	0.633338	0.639946	0.645223	0.650536	0.65591	0.660281	0.66564	0.669189	0.674136	0.677192	0.682219	0.685254	0.690248	0.692617	0.697652	0.699774	0.70456	0.706964	0.711361	0.71375	0.717857	0.719819	0.724283	0.727532	0.729854	0.733143	0.735791	0.738624	0.741611	0.743794	0.74545	0.748434	0.752067	0.754168	0.757736	0.760161	0.763918	0.76606
8 ppt	0.747081	0.744058	0.735934	0.719388	0.640556	0.601898	0.593304	0.591119	0.593093	0.595806	0.601732	0.606904	0.613212	0.618372	0.623733	0.629056	0.633268	0.638484	0.642021	0.64727	0.649869	0.655007	0.657634	0.662796	0.665072	0.669823	0.671959	0.67657	0.678809	0.6832	0.685286	0.689623	0.691233	0.694986	0.698162	0.700354	0.703509	0.705868	0.708413	0.711427	0.713771	0.714969	0.7175	0.72098	0.722716	0.726338	0.728347	0.732305	0.734071
8 ppt	0.725459	0.720994	0.713973	0.692754	0.615906	0.579706	0.572515	0.570286	0.571973	0.574336	0.580213	0.584649	0.590328	0.595389	0.600282	0.605353	0.609046	0.614309	0.617333	0.622269	0.624697	0.629489	0.63213	0.637166	0.639154	0.643715	0.64589	0.650621	0.652671	0.657364	0.65949	0.6635	0.665466	0.669621	0.672934	0.675204	0.678534	0.681029	0.683645	0.686519	0.688827	0.690504	0.693347	0.696799	0.698777	0.702612	0.704622	0.708909	0.711056
8 ppt	0.726632	0.723273	0.712272	0.69271	0.614516	0.578585	0.571385	0.569669	0.571994	0.574104	0.579884	0.583624	0.589425	0.594356	0.599111	0.604557	0.60829	0.613426	0.616774	0.622213	0.624997	0.630366	0.633367	0.638573	0.641501	0.646196	0.64908	0.653645	0.656217	0.660582	0.663393	0.667277	0.670516	0.675136	0.67809	0.681898	0.684624	0.688622	0.691175	0.695146	0.697482	0.699572	0.704003	0.708574	0.711311	0.715599	0.718186	0.721992	0.724221
20 ppt	0.852724	0.849022	0.844099	0.825032	0.75758	0.725676	0.716838	0.713911	0.714895	0.718623	0.729043	0.738373	0.746254	0.752404	0.756811	0.7624	0.765607	0.771019	0.773242	0.778183	0.780217	0.784736	0.786911	0.791268	0.793437	0.796634	0.798145	0.801636	0.802568	0.80591	0.807213	0.809812	0.810777	0.812675	0.814259	0.815693	0.818097	0.819874	0.821327	0.822894	0.823212	0.823772	0.825264	0.826541	0.827523	0.829808	0.830848	0.832382	0.833042
20 ppt	0.805321	0.799956	0.789659	0.769959	0.697142	0.665309	0.658676	0.655009	0.656364	0.659617	0.669363	0.6776	0.684917	0.690689	0.695013	0.699597	0.703491	0.707813	0.710561	0.714523	0.716903	0.720732	0.723507	0.727071	0.728778	0.73244	0.733761	0.737407	0.738375	0.74151	0.743199	0.746524	0.746577	0.748909	0.750635	0.7518	0.754074	0.754839	0.756248	0.758282	0.759046	0.759898	0.760687	0.762593	0.762934	0.764863	0.765435	0.767997	0.768961
20 ppt	0.834296	0.832538	0.824136	0.807227	0.741636	0.709627	0.701712	0.699269	0.700726	0.703959	0.713605	0.722318	0.729946	0.735574	0.739277	0.744739	0.74779	0.752749	0.755033	0.759502	0.761637	0.766084	0.768358	0.772428	0.774555	0.777649	0.778982	0.782144	0.78297	0.786281	0.787177	0.790122	0.791005	0.792818	0.794126	0.7951	0.797013	0.797687	0.798743	0.799925	0.800932	0.801163	0.801794	0.802866	0.802888	0.804147	0.804599	0.806057	0.806118
20 ppt	0.846723	0.840227	0.833974	0.816086	0.741623	0.713662	0.708611	0.707616	0.710189	0.715418	0.725672	0.734678	0.742896	0.748685	0.754199	0.758792	0.763261	0.767878	0.771333	0.775719	0.779039	0.782919	0.785894	0.790083	0.792621	0.796362	0.797731	0.801238	0.802919	0.805448	0.807152	0.810175	0.812016	0.814241	0.81566	0.817993	0.819828	0.822534	0.823481	0.826146	0.826841	0.828234	0.830201	0.832397	0.833846	0.835612	0.836751	0.838511	0.839817
20 ppt	0.819436	0.813876	0.810013	0.790901	0.714747	0.683416	0.676578	0.673927	0.674986	0.67905	0.688985	0.698756	0.706599	0.713022	0.718567	0.723622	0.728351	0.732795	0.736621	0.740593	0.743959	0.748099	0.751063	0.755552	0.757138	0.76167	0.763212	0.766656	0.768224	0.771184	0.77308	0.776665	0.777387	0.779409	0.781458	0.782296	0.785152	0.786265	0.787729	0.789314	0.790954	0.791614	0.792635	0.794306	0.795075	0.796867	0.797691	0.799717	0.800383
20 ppt	0.849027	0.843784	0.837824	0.81826	0.745974	0.71574	0.71187	0.709122	0.711113	0.716416	0.72688	0.73599	0.744188	0.749957	0.755952	0.760423	0.764789	0.768957	0.772469	0.776201	0.778967	0.782631	0.784891	0.788878	0.790181	0.793535	0.794643	0.797641	0.799002	0.801387	0.802786	0.80568	0.806001	0.807968	0.809148	0.809673	0.811837	0.812326	0.813612	0.814848	0.815756	0.816373	0.817197	0.817793	0.818297	0.819565	0.820091	0.821873	0.822626
20 ppt	0.844754	0.840072	0.835526	0.814515	0.750812	0.72241	0.715428	0.712793	0.715285	0.720136	0.730873	0.740355	0.748289	0.75412	0.759022	0.763881	0.767436	0.771569	0.774788	0.778212	0.78111	0.784627	0.787471	0.791159	0.792483	0.795886	0.79718	0.799963	0.801041	0.804026	0.8053	0.808297	0.808595	0.810567	0.811973	0.812398	0.814766	0.815446	0.816555	0.818057	0.81903	0.819743	0.820237	0.82185	0.821778	0.823306	0.823334	0.825496	0.826163
20 ppt	0.82227	0.817217	0.809332	0.788267	0.708201	0.680293	0.676088	0.674865	0.67689	0.682083	0.692485	0.701309	0.709791	0.715324	0.720974	0.725316	0.729739	0.734663	0.738276	0.742223	0.745747	0.749637	0.752949	0.75676	0.75887	0.762855	0.764374	0.768098	0.769626	0.772242	0.774115	0.777207	0.778543	0.78166	0.783158	0.785075	0.787523	0.790431	0.791416	0.79374	0.795273	0.796767	0.798983	0.801613	0.803467	0.805627	0.807479	0.809825	0.810578
20 ppt	0.779189	0.773886	0.765597	0.745305	0.66797	0.6348	0.629215	0.62537	0.626995	0.630087	0.639744	0.647201	0.654097	0.659259	0.663857	0.667765	0.671775	0.67576	0.678477	0.682145	0.684465	0.687842	0.689905	0.693936	0.694869	0.698652	0.69962	0.703025	0.70411	0.706818	0.708524	0.711761	0.711916	0.714078	0.716197	0.716924	0.719776	0.721099	0.722534	0.724641	0.725946	0.726833	0.728288	0.730508	0.731389	0.734135	0.734764	0.737913	0.739371
20 ppt	0.844508	0.845769	0.837294	0.818862	0.751175	0.720273	0.714403	0.711583	0.712804	0.716179	0.726931	0.735495	0.743092	0.748715	0.753055	0.757893	0.76143	0.76593	0.768424	0.772426	0.774617	0.778382	0.780389	0.784091	0.785672	0.788905	0.789949	0.792754	0.793618	0.796372	0.797313	0.799895	0.800502	0.802121	0.803567	0.804586	0.806275	0.807882	0.809007	0.81022	0.81074	0.811541	0.812916	0.814204	0.814699	0.816799	0.817353	0.819584	0.820168
33 ppt	0.85676	0.854497	0.843629	0.820835	0.740059	0.706297	0.70079	0.69982	0.703646	0.709945	0.722597	0.733373	0.743235	0.750541	0.756599	0.762707	0.768233	0.773563	0.777739	0.783061	0.786992	0.791519	0.794783	0.799089	0.801841	0.805895	0.808481	0.811616	0.813737	0.816694	0.819527	0.822285	0.824678	0.82696	0.828563	0.830788	0.833176	0.836154	0.837676	0.83994	0.841483	0.842569	0.844798	0.846735	0.84786	0.849904	0.850017	0.852188	0.852649
33 ppt	0.846083	0.843115	0.84029	0.818151	0.752794	0.723048	0.716034	0.714932	0.71798	0.723342	0.736439	0.747255	0.756241	0.763213	0.768628	0.774559	0.778468	0.78295	0.786803	0.790744	0.79351	0.797335	0.799878	0.803355	0.805526	0.808773	0.810062	0.812961	0.814522	0.817052	0.818325	0.821118	0.821859	0.823209	0.824983	0.825245	0.827816	0.828774	0.829917	0.831374	0.83211	0.832654	0.832728	0.833693	0.834156	0.835572	0.835046	0.837522	0.837565
33 ppt	0.883635	0.885001	0.880023	0.856409	0.778531	0.750793	0.744357	0.741958	0.74543	0.752755	0.766836	0.780437	0.790335	0.797919	0.804728	0.809966	0.815268	0.819798	0.823928	0.827189	0.830895	0.834282	0.837411	0.840793	0.842229	0.845139	0.845935	0.848279	0.849203	0.851224	0.852497	0.855083	0.854724	0.855975	0.85669	0.856485	0.858959	0.859577	0.859642	0.860674	0.861074	0.860846	0.860742	0.861076	0.860626	0.861276	0.860271	0.862145	0.861474
33 ppt	0.868999	0.866032	0.863076	0.845925	0.776883	0.746335	0.737871	0.736203	0.738036	0.743382	0.755692	0.76661	0.776194	0.783217	0.788774	0.794591	0.799154	0.804479	0.80803	0.812638	0.815599	0.819141	0.822261	0.825711	0.827483	0.830967	0.832388	0.835337	0.83631	0.839033	0.840372	0.842824	0.843118	0.844855	0.845764	0.846361	0.848448	0.848849	0.850095	0.85113	0.851023	0.851793	0.851753	0.851978	0.852087	0.852692	0.852745	0.85462	0.853605
33 ppt	0.864858	0.858317	0.853494	0.834439	0.759871	0.732039	0.727104	0.726168	0.729529	0.736824	0.750384	0.762268	0.772648	0.780338	0.786653	0.792538	0.797298	0.80258	0.805768	0.810471	0.813146	0.817231	0.81987	0.82378	0.825709	0.828886	0.830455	0.832889	0.834071	0.836224	0.837926	0.840246	0.841266	0.842826	0.84431	0.845778	0.847827	0.84967	0.850671	0.852235	0.853224	0.853927	0.854664	0.856938	0.857997	0.859386	0.860679	0.862051	0.86257
33 ppt	0.862899	0.861174	0.857272	0.840399	0.775114	0.748339	0.740432	0.738666	0.741468	0.74789	0.760621	0.772412	0.781709	0.788798	0.794715	0.800665	0.805468	0.810536	0.814574	0.818443	0.821869	0.825822	0.828897	0.832644	0.834908	0.83808	0.83986	0.842232	0.844112	0.847113	0.848467	0.851718	0.852603	0.854242	0.856127	0.857068	0.859534	0.860882	0.862049	0.86379	0.864928	0.865773	0.866374	0.867799	0.868483	0.869853	0.870461	0.872121	0.873033
33 ppt	0.891662	0.894018	0.886727	0.867308	0.800635	0.77116	0.763137	0.761009	0.764191	0.770611	0.783894	0.795722	0.805596	0.813234	0.819328	0.825449	0.830305	0.835597	0.839468	0.843669	0.847093	0.850928	0.853852	0.857481	0.86002	0.863184	0.864776	0.86738	0.868986	0.871933	0.873824	0.876119	0.877236	0.879072	0.880532	0.881125	0.883762	0.88489	0.886413	0.887474	0.888208	0.888998	0.889376	0.89011	0.890479	0.891728	0.891734	0.893082	0.893473
33 ppt	0.878148	0.874681	0.868963	0.849994	0.776406	0.744649	0.736946	0.735572	0.737787	0.744763	0.757606	0.768953	0.778473	0.785322	0.791723	0.797305	0.802213	0.807539	0.811362	0.815585	0.819043	0.822942	0.826369	0.830322	0.832446	0.835905	0.837154	0.840146	0.841713	0.844114	0.845894	0.848748	0.849625	0.851135	0.852396	0.853018	0.855462	0.856561	0.857763	0.858782	0.85981	0.860458	0.860752	0.861452	0.861972	0.862938	0.863404	0.864642	0.865134
41 ppt	0.892117	0.889828	0.884243	0.866735	0.792548	0.758833	0.752334	0.751263	0.755695	0.764868	0.782816	0.797912	0.810165	0.81964	0.826925	0.834716	0.839816	0.846238	0.849937	0.855388	0.858599	0.86296	0.865631	0.868932	0.8718	0.874294	0.876125	0.878514	0.879079	0.881466	0.882523	0.884117	0.885022	0.885585	0.885974	0.887166	0.889008	0.890341	0.890754	0.891623	0.891861	0.891602	0.891657	0.891907	0.892088	0.893375	0.893144	0.89333	0.893048
41 ppt	0.895925	0.897749	0.892615	0.871771	0.798695	0.768592	0.762621	0.763056	0.768914	0.779644	0.797895	0.814211	0.82677	0.837197	0.845197	0.85269	0.858858	0.864216	0.86893	0.873329	0.876816	0.880571	0.883773	0.887258	0.889667	0.891833	0.892863	0.894451	0.895796	0.897211	0.898559	0.900603	0.90056	0.901403	0.901479	0.901858	0.903854	0.904368	0.904303	0.90495	0.904843	0.905484	0.904919	0.904941	0.904894	0.904764	0.904711	0.905052	0.904851
41 ppt	0.899761	0.89508	0.89777	0.869281	0.79306	0.766932	0.762598	0.765086	0.771858	0.78258	0.800074	0.815844	0.828077	0.837168	0.84518	0.852102	0.857933	0.863722	0.8683	0.87298	0.876571	0.881017	0.884068	0.888212	0.890602	0.89358	0.894677	0.897396	0.898615	0.900677	0.902213	0.904227	0.905338	0.90633	0.906799	0.908535	0.910435	0.91199	0.912008	0.912714	0.913505	0.913341	0.914572	0.914929	0.914779	0.915904	0.915337	0.915961	0.916669
41 ppt	0.910262	0.906704	0.900722	0.873242	0.793158	0.765787	0.763006	0.763893	0.770713	0.783519	0.801905	0.818885	0.831724	0.841415	0.849721	0.855709	0.861953	0.867153	0.872115	0.875612	0.879954	0.882845	0.886404	0.889469	0.890415	0.892799	0.892875	0.894236	0.894629	0.894913	0.895906	0.896971	0.896392	0.896247	0.895286	0.894582	0.896054	0.895503	0.894785	0.894256	0.89396	0.892655	0.891691	0.890782	0.889485	0.888047	0.88649	0.886636	0.885253
41 ppt	0.871854	0.870786	0.866531	0.846406	0.7865	0.763569	0.761081	0.763667	0.770364	0.78196	0.801252	0.817271	0.830203	0.840274	0.848426	0.855246	0.861623	0.867182	0.871926	0.876276	0.880471	0.884352	0.888074	0.891888	0.893645	0.896668	0.89766	0.899459	0.900781	0.902345	0.903841	0.905392	0.905499	0.906341	0.906241	0.906534	0.908227	0.908664	0.908785	0.909597	0.909164	0.909102	0.908063	0.908119	0.907993	0.907784	0.906965	0.907452	0.906855
41 ppt	0.902278	0.896323	0.892096	0.871072	0.804157	0.77234	0.765893	0.765228	0.770538	0.779025	0.797097	0.81264	0.824483	0.833508	0.840512	0.847457	0.852758	0.859186	0.862954	0.86822	0.871317	0.876394	0.879163	0.8837	0.88572	0.88817	0.889826	0.8918	0.891723	0.894133	0.89516	0.896394	0.897234	0.89738	0.897166	0.897307	0.899499	0.899745	0.899835	0.90057	0.900213	0.899657	0.899685	0.899186	0.898413	0.899237	0.898446	0.899474	0.898221
41 ppt	0.88072	0.877687	0.874469	0.856506	0.790905	0.762456	0.757169	0.758066	0.762534	0.771738	0.788311	0.803048	0.814687	0.823659	0.830362	0.837138	0.842357	0.84775	0.85197	0.856563	0.860249	0.863582	0.866715	0.869851	0.871683	0.874915	0.876449	0.878357	0.879113	0.880996	0.882127	0.884058	0.884311	0.884535	0.884698	0.884891	0.886625	0.886528	0.886541	0.886382	0.886071	0.88595	0.885085	0.884831	0.88345	0.883435	0.882178	0.882358	0.880559
41 ppt	0.904612	0.901688	0.896211	0.877083	0.807739	0.776336	0.765249	0.764076	0.76814	0.777454	0.796535	0.811662	0.824888	0.835214	0.84338	0.85131	0.857383	0.864308	0.868876	0.874672	0.878761	0.884039	0.887918	0.892484	0.895828	0.899206	0.901506	0.904153	0.905954	0.908923	0.910992	0.913832	0.91552	0.91696	0.918446	0.919848	0.922014	0.923812	0.925448	0.926496	0.927186	0.92808	0.928643	0.929199	0.929464	0.930393	0.930856	0.931486	0.931615
55 ppt	0.559325	0.551215	0.530817	0.507335	0.384918	0.324793	0.308301	0.29685	0.292277	0.288692	0.2886	0.287614	0.289041	0.288246	0.290809	0.291123	0.293159	0.293667	0.296023	0.297062	0.299162	0.300879	0.303301	0.30504	0.307258	0.309459	0.31198	0.314175	0.317036	0.319065	0.322396	0.324596	0.327679	0.33169	0.334083	0.337585	0.339658	0.344291	0.34609	0.351037	0.35334	0.355953	0.360731	0.365879	0.368851	0.374316	0.376498	0.382186	0.384241
55 ppt	0.570561	0.567649	0.554216	0.529209	0.423822	0.363687	0.34266	0.33111	0.325997	0.322379	0.322723	0.321928	0.323643	0.323574	0.326131	0.32684	0.329238	0.330218	0.332492	0.334121	0.335918	0.337886	0.339697	0.342236	0.34401	0.346472	0.348683	0.351042	0.353288	0.355703	0.358476	0.360573	0.363398	0.366757	0.369044	0.372171	0.374222	0.37834	0.379838	0.384265	0.386134	0.388563	0.392994	0.397558	0.399917	0.405775	0.407685	0.412591	0.415161
55 ppt	0.602593	0.599552	0.587022	0.556693	0.441593	0.38388	0.367223	0.356684	0.35257	0.349749	0.350575	0.350157	0.352605	0.352444	0.35531	0.356383	0.359289	0.360583	0.363049	0.36479	0.366712	0.36928	0.371058	0.373778	0.375445	0.378471	0.380504	0.383278	0.385446	0.388227	0.390639	0.393146	0.395708	0.399315	0.401323	0.404166	0.406395	0.410403	0.411914	0.416286	0.418171	0.420261	0.424261	0.429176	0.431137	0.436486	0.438349	0.443449	0.445628
55 ppt	0.527354	0.516849	0.492491	0.454876	0.305564	0.235301	0.215534	0.202342	0.195485	0.190622	0.18837	0.185454	0.185298	0.182661	0.183787	0.182189	0.183146	0.181895	0.183227	0.182293	0.18378	0.183711	0.185462	0.185503	0.186954	0.187589	0.189536	0.18981	0.192421	0.192692	0.195553	0.19647	0.199162	0.201754	0.20267	0.205462	0.206459	0.209853	0.210855	0.21467	0.215931	0.218199	0.222075	0.225783	0.227912	0.232595	0.233947	0.238396	0.240244
55 ppt	0.592864	0.592266	0.573663	0.538626	0.409788	0.34587	0.32822	0.315663	0.311009	0.307196	0.307381	0.306333	0.307696	0.307321	0.309691	0.310234	0.312652	0.313081	0.315587	0.316731	0.319072	0.320704	0.323151	0.32512	0.327429	0.329543	0.332008	0.334274	0.337269	0.33928	0.342656	0.344722	0.347923	0.351728	0.353822	0.357668	0.35957	0.363947	0.365394	0.370393	0.372402	0.375039	0.37947	0.384424	0.387279	0.392377	0.394944	0.400222	0.402784
55 ppt	0.542511	0.538583	0.523543	0.499975	0.38863	0.329591	0.31069	0.299968	0.294995	0.291552	0.291762	0.290762	0.292292	0.291977	0.294265	0.294565	0.296879	0.29789	0.299931	0.301212	0.303038	0.304999	0.306782	0.30904	0.310764	0.312813	0.314896	0.317299	0.319239	0.321316	0.323796	0.325746	0.328311	0.331304	0.333069	0.335895	0.337553	0.341236	0.342488	0.346664	0.348288	0.350009	0.354072	0.358161	0.359824	0.365037	0.366596	0.371752	0.373501
55 ppt	0.580992	0.577401	0.555324	0.528218	0.392425	0.319075	0.295929	0.284401	0.278621	0.274015	0.274003	0.27273	0.274183	0.27335	0.275608	0.27619	0.278295	0.278838	0.281444	0.28256	0.285078	0.286782	0.289467	0.291549	0.294116	0.296533	0.299691	0.301915	0.305173	0.30736	0.311198	0.313857	0.31779	0.322149	0.324753	0.329311	0.331471	0.336484	0.33879	0.344253	0.346624	0.349835	0.355162	0.360484	0.363456	0.369534	0.372244	0.377866	0.380311
55 ppt	0.485958	0.485444	0.460488	0.436024	0.320464	0.258765	0.238805	0.225934	0.218598	0.21289	0.210599	0.207903	0.207152	0.204868	0.20529	0.203544	0.204152	0.203439	0.203899	0.203322	0.204096	0.204065	0.204434	0.204755	0.205263	0.205698	0.206602	0.206976	0.208056	0.208306	0.209459	0.21039	0.211328	0.212675	0.213002	0.214244	0.214639	0.216999	0.217022	0.219418	0.220097	0.221161	0.223608	0.226167	0.226997	0.230415	0.231216	0.23454	0.235666
55 ppt	0.504014	0.499116	0.48416	0.451826	0.334249	0.270598	0.246995	0.231896	0.223369	0.217218	0.21446	0.211406	0.211036	0.208976	0.209236	0.208099	0.208801	0.208291	0.209264	0.208946	0.209447	0.20986	0.210627	0.211117	0.211937	0.21265	0.213658	0.214511	0.215663	0.216234	0.21774	0.218667	0.220184	0.221878	0.222306	0.223852	0.224623	0.227204	0.227669	0.2305	0.23095	0.232607	0.235309	0.23808	0.239474	0.243195	0.244399	0.24807	0.249242
55 ppt	0.533728	0.525904	0.514451	0.480675	0.349661	0.286762	0.265477	0.249896	0.241629	0.235114	0.232578	0.22939	0.229096	0.226578	0.227459	0.22572	0.226992	0.226143	0.227525	0.226932	0.227936	0.22805	0.228973	0.229939	0.230557	0.231565	0.232383	0.233361	0.234864	0.235418	0.237204	0.238203	0.239591	0.241453	0.24199	0.243513	0.244345	0.246946	0.247186	0.250209	0.251012	0.252408	0.255235	0.258074	0.259335	0.263274	0.26398	0.267941	0.268904
55 ppt	0.590432	0.580853	0.569048	0.547666	0.44924	0.399489	0.386142	0.377611	0.37592	0.374195	0.375914	0.376767	0.380197	0.381645	0.385558	0.388175	0.391896	0.394366	0.397648	0.400784	0.403427	0.406798	0.409558	0.41318	0.415551	0.419389	0.422006	0.425724	0.42821	0.431672	0.434867	0.437971	0.440949	0.445242	0.448179	0.451636	0.454513	0.458862	0.460879	0.465554	0.468079	0.47042	0.474582	0.479937	0.482416	0.488021	0.489704	0.495431	0.497771
55 ppt	0.488174	0.481442	0.463777	0.432312	0.320898	0.259584	0.238377	0.225125	0.21791	0.211924	0.209678	0.207384	0.207133	0.205037	0.205811	0.20452	0.205384	0.204686	0.205597	0.205462	0.206151	0.206088	0.207035	0.20773	0.208299	0.209155	0.210352	0.210934	0.212408	0.213082	0.214821	0.21557	0.217489	0.219329	0.220177	0.222264	0.222993	0.225936	0.226458	0.229702	0.230563	0.232313	0.235615	0.238909	0.240402	0.244415	0.245234	0.249532	0.251443
[truncated: 76 more columns]

## Sheet: pH
	380	385	390	395	400	405	410	415	420	425	430	435	440	445	450	455	460	465	470	475	480	485	490	495	500	505	510	515	520	525	530	535	540	545	550	555	560	565	570	575	580	585	590	595	600	605	610	615	620
pH 1.3	0.519663	0.511977	0.479954	0.397292	0.247068	0.196555	0.177974	0.163748	0.156117	0.150802	0.149795	0.147233	0.147645	0.146411	0.147259	0.147596	0.148221	0.148795	0.150346	0.150939	0.152179	0.153004	0.154825	0.156028	0.158193	0.159286	0.160612	0.162561	0.164649	0.166285	0.168161	0.170058	0.172337	0.175211	0.177194	0.179617	0.181481	0.184392	0.186029	0.188931	0.191034	0.192718	0.195219	0.198945	0.200899	0.204092	0.206261	0.209728	0.211598
pH 1.3	0.389534	0.379268	0.354458	0.303793	0.206137	0.170183	0.158128	0.147374	0.142928	0.138904	0.13867	0.13685	0.13722	0.136624	0.13758	0.137765	0.138483	0.138927	0.140234	0.140872	0.142148	0.142785	0.144526	0.145537	0.147289	0.14827	0.149609	0.151117	0.153091	0.154582	0.156241	0.157956	0.159943	0.162279	0.164206	0.166541	0.168078	0.170713	0.172193	0.17481	0.176553	0.178065	0.18061	0.183722	0.185584	0.188561	0.190273	0.19346	0.195135
pH 1.3	0.443966	0.434633	0.400715	0.324289	0.201461	0.160543	0.146262	0.133998	0.128093	0.123241	0.122064	0.119531	0.119052	0.118026	0.118064	0.117672	0.117676	0.117812	0.1183	0.118352	0.119111	0.11919	0.120257	0.120664	0.121993	0.122294	0.123158	0.124262	0.125391	0.126256	0.127369	0.128515	0.129835	0.131434	0.132568	0.134228	0.135178	0.13711	0.137825	0.140031	0.140996	0.142293	0.144046	0.146568	0.147621	0.150006	0.151406	0.153934	0.154963
pH 1.3	0.506745	0.494318	0.46295	0.373179	0.226513	0.17853	0.160002	0.145082	0.137114	0.131169	0.128961	0.125935	0.125139	0.123529	0.123353	0.122809	0.122738	0.122796	0.123238	0.123192	0.12366	0.123855	0.124919	0.125393	0.126656	0.126994	0.127776	0.128772	0.130141	0.130965	0.132101	0.13337	0.134696	0.136383	0.137585	0.139325	0.140289	0.142341	0.143116	0.14539	0.146446	0.147682	0.14944	0.152045	0.153309	0.155545	0.156966	0.159485	0.160662
pH 1.3	0.476808	0.472552	0.44228	0.369346	0.239201	0.194099	0.176268	0.162368	0.155551	0.149944	0.148641	0.14585	0.146029	0.144466	0.145156	0.144937	0.145286	0.145653	0.146742	0.147063	0.148203	0.148631	0.15018	0.151024	0.152852	0.153735	0.154728	0.156325	0.158088	0.1596	0.161176	0.162768	0.164715	0.167293	0.168854	0.171022	0.172691	0.175208	0.176635	0.179308	0.181106	0.18257	0.185006	0.188503	0.19029	0.193167	0.195244	0.198372	0.200127
pH 1.3	0.491851	0.479376	0.448928	0.363738	0.214652	0.168471	0.153362	0.140998	0.135135	0.129998	0.129387	0.126515	0.126628	0.125305	0.125754	0.125576	0.125908	0.126021	0.126974	0.127241	0.128092	0.128568	0.13012	0.130731	0.132342	0.133092	0.134279	0.135767	0.137411	0.138562	0.140309	0.141861	0.143676	0.145913	0.147627	0.150064	0.151154	0.153775	0.155003	0.157955	0.159268	0.1608	0.163456	0.166758	0.168261	0.171169	0.173134	0.176273	0.177958
pH 1.3	0.423829	0.411792	0.385513	0.326333	0.21072	0.17093	0.157536	0.145594	0.14007	0.135671	0.135227	0.132994	0.133044	0.132254	0.132963	0.132964	0.133526	0.1339	0.135078	0.135425	0.136659	0.136955	0.138851	0.13961	0.141359	0.142241	0.143461	0.145025	0.146831	0.14829	0.149953	0.151582	0.153426	0.155918	0.157765	0.160025	0.161434	0.16426	0.165525	0.168365	0.170038	0.171608	0.174087	0.177266	0.17933	0.182068	0.183927	0.187124	0.188838
pH 1.3	0.477844	0.468983	0.431374	0.346635	0.200355	0.157479	0.143703	0.132788	0.128393	0.123965	0.12366	0.121118	0.121511	0.120437	0.121006	0.12103	0.121573	0.121692	0.122865	0.12315	0.124194	0.124822	0.126275	0.126961	0.128648	0.1294	0.130869	0.132075	0.133863	0.135064	0.136812	0.138353	0.140172	0.142347	0.144089	0.146295	0.14742	0.150017	0.151226	0.153961	0.155284	0.156752	0.159374	0.16246	0.163923	0.166919	0.168506	0.171696	0.173141
pH 2.3	0.507108	0.500084	0.464741	0.381873	0.223204	0.173505	0.156751	0.143499	0.13737	0.132231	0.131762	0.129357	0.129743	0.129014	0.129951	0.130396	0.131384	0.132069	0.133713	0.134498	0.136302	0.137446	0.139763	0.141121	0.143588	0.145234	0.147176	0.149418	0.151876	0.15425	0.156734	0.159167	0.1619	0.165581	0.168126	0.171592	0.173803	0.177214	0.179443	0.183234	0.185611	0.187748	0.191518	0.196048	0.198505	0.202565	0.205209	0.209593	0.212134
pH 2.3	0.437857	0.425146	0.398968	0.336482	0.220667	0.180704	0.165721	0.152708	0.147016	0.142288	0.141573	0.139536	0.139897	0.139396	0.140389	0.140761	0.141882	0.142644	0.144158	0.145275	0.146874	0.147818	0.150067	0.151503	0.153863	0.155258	0.157106	0.159083	0.161445	0.163489	0.165786	0.168195	0.170519	0.173556	0.176179	0.178987	0.181166	0.18428	0.186327	0.189344	0.191743	0.193667	0.196895	0.200622	0.203026	0.206468	0.208693	0.212445	0.214908
pH 2.3	0.466837	0.456455	0.426853	0.365707	0.229524	0.178256	0.162124	0.147808	0.140759	0.135345	0.134644	0.131807	0.132192	0.130928	0.131811	0.131987	0.132709	0.133062	0.134504	0.135132	0.136749	0.137306	0.139511	0.140607	0.142828	0.144104	0.145757	0.147724	0.149926	0.151918	0.154124	0.1563	0.158678	0.16193	0.164293	0.167457	0.169266	0.172498	0.174379	0.177891	0.180328	0.182316	0.185598	0.189766	0.192242	0.195833	0.198456	0.202627	0.204797
pH 2.3	0.456978	0.446885	0.415693	0.349723	0.210188	0.16396	0.1493	0.13845	0.133341	0.12937	0.129479	0.127073	0.128158	0.127308	0.128495	0.129075	0.130219	0.130918	0.132712	0.133535	0.135476	0.136439	0.138727	0.140159	0.14257	0.144332	0.146182	0.148338	0.150869	0.153057	0.155647	0.157888	0.16053	0.164083	0.166599	0.170012	0.171907	0.175516	0.177665	0.18139	0.183669	0.185875	0.189559	0.194007	0.19651	0.200347	0.203137	0.207364	0.209939
pH 2.3	0.38567	0.374531	0.353462	0.301788	0.204091	0.166494	0.152898	0.141289	0.136195	0.131716	0.131152	0.129184	0.129536	0.128677	0.129485	0.129593	0.130475	0.130857	0.132067	0.132651	0.133928	0.134592	0.136182	0.137283	0.139189	0.140328	0.141763	0.143369	0.145259	0.146979	0.148841	0.150701	0.152746	0.155344	0.157374	0.159864	0.161535	0.164328	0.165983	0.168732	0.170699	0.17243	0.175107	0.178634	0.180623	0.183637	0.185575	0.188953	0.190946
pH 2.3	0.474951	0.468433	0.437099	0.353858	0.214479	0.171149	0.155426	0.142609	0.136828	0.132463	0.131576	0.12949	0.130013	0.129205	0.13013	0.130362	0.131336	0.131994	0.133473	0.134169	0.135788	0.136884	0.138862	0.140006	0.142334	0.143747	0.145417	0.147404	0.149736	0.151717	0.153966	0.15615	0.158696	0.161913	0.164119	0.166928	0.169252	0.172134	0.17437	0.177445	0.180105	0.18196	0.185116	0.189224	0.191651	0.19512	0.197585	0.201538	0.203773
pH 2.3	0.460034	0.448285	0.414089	0.339525	0.211116	0.170928	0.156263	0.143554	0.138247	0.133372	0.132468	0.130319	0.130559	0.129674	0.130624	0.130557	0.13153	0.132075	0.133417	0.134002	0.135407	0.13622	0.138105	0.139126	0.141004	0.14215	0.143682	0.145519	0.147291	0.148951	0.150841	0.152744	0.154813	0.157344	0.159256	0.161715	0.163477	0.166074	0.167578	0.170333	0.172272	0.173844	0.176541	0.180029	0.181737	0.184818	0.18672	0.190098	0.191819
pH 2.3	0.407699	0.398445	0.375925	0.318945	0.212088	0.172388	0.158306	0.1455	0.139721	0.135079	0.135026	0.132929	0.133639	0.133192	0.134451	0.134946	0.136029	0.136933	0.138595	0.139573	0.141563	0.14261	0.144878	0.146472	0.148918	0.150529	0.152549	0.154596	0.157284	0.159541	0.161917	0.164448	0.16717	0.170525	0.173282	0.176381	0.178845	0.18221	0.184541	0.187955	0.190551	0.192729	0.196228	0.200686	0.203408	0.207208	0.209785	0.213813	0.216443
pH 2.3	0.526674	0.516698	0.48119	0.383079	0.226639	0.177724	0.159826	0.144905	0.138355	0.133038	0.131911	0.12991	0.130093	0.129424	0.130248	0.130535	0.131495	0.132311	0.133711	0.134651	0.136266	0.137435	0.139587	0.140885	0.143171	0.144656	0.146628	0.148608	0.150929	0.153061	0.155372	0.157629	0.160121	0.163385	0.165595	0.168455	0.170831	0.173659	0.175985	0.178962	0.181469	0.183339	0.18641	0.190404	0.192659	0.19612	0.198459	0.202235	0.204468
pH 2.3	0.499955	0.49257	0.464071	0.382138	0.245155	0.203544	0.190039	0.179301	0.175317	0.172201	0.173045	0.17262	0.174498	0.175403	0.177955	0.179598	0.182368	0.184609	0.187786	0.190261	0.193573	0.196111	0.199772	0.202735	0.206472	0.209656	0.212805	0.216746	0.220027	0.223758	0.227247	0.231104	0.234733	0.239737	0.243442	0.247415	0.251282	0.255266	0.258884	0.262697	0.266509	0.269114	0.273349	0.278941	0.282271	0.286691	0.29004	0.294852	0.297943
pH 3.4	0.926692	0.920248	0.910911	0.875611	0.820834	0.802801	0.79691	0.790069	0.791665	0.797048	0.809054	0.821398	0.833716	0.844597	0.854635	0.864696	0.872001	0.87739	0.880255	0.882136	0.881171	0.880718	0.879636	0.880104	0.880159	0.881136	0.881998	0.884775	0.887427	0.891819	0.895662	0.900266	0.904258	0.908232	0.910876	0.9129	0.914462	0.914873	0.915373	0.912813	0.911796	0.910482	0.907674	0.905253	0.904385	0.902409	0.902108	0.901327	0.900991
pH 3.4	0.894209	0.892657	0.881549	0.855021	0.799981	0.783578	0.779445	0.776696	0.776786	0.781482	0.791594	0.800197	0.809724	0.817421	0.824973	0.833708	0.840162	0.84812	0.853133	0.858752	0.861387	0.864105	0.86467	0.865372	0.865055	0.865118	0.864654	0.865468	0.866577	0.870091	0.873167	0.877309	0.881402	0.886753	0.890708	0.894686	0.898998	0.90124	0.904283	0.903734	0.904566	0.90378	0.903174	0.901663	0.900939	0.899632	0.899481	0.898882	0.899286
pH 3.4	0.897968	0.897438	0.887197	0.859305	0.802354	0.782682	0.778498	0.777431	0.781231	0.788866	0.799808	0.807941	0.815552	0.820626	0.826776	0.834686	0.840985	0.848419	0.854228	0.859889	0.863092	0.8666	0.868401	0.870457	0.871698	0.873888	0.874731	0.876393	0.877866	0.880633	0.882168	0.884065	0.88581	0.887474	0.88905	0.89106	0.893828	0.895862	0.89916	0.900488	0.903287	0.904067	0.905625	0.907458	0.908967	0.909459	0.910273	0.910428	0.910508
pH 3.4	0.875795	0.875989	0.858164	0.810389	0.741605	0.721326	0.719525	0.719376	0.725324	0.732595	0.743327	0.751768	0.760334	0.767205	0.773557	0.779723	0.785419	0.79122	0.795828	0.80123	0.804493	0.809901	0.813177	0.817657	0.82004	0.822874	0.824647	0.826437	0.8275	0.82955	0.830219	0.832407	0.833351	0.835069	0.837582	0.839202	0.843138	0.844976	0.848834	0.850507	0.85335	0.85477	0.855742	0.856945	0.858057	0.858493	0.858669	0.858335	0.858277
pH 3.4	0.893606	0.891606	0.886109	0.844764	0.790143	0.77683	0.773882	0.774062	0.777179	0.783801	0.794641	0.802373	0.811221	0.818062	0.824412	0.831796	0.837715	0.844386	0.84935	0.855346	0.8589	0.863523	0.866085	0.86812	0.868442	0.868887	0.868007	0.867768	0.866895	0.868028	0.868894	0.870642	0.872889	0.875858	0.879475	0.883022	0.888104	0.891453	0.896264	0.898094	0.90162	0.902118	0.903541	0.90405	0.904289	0.903483	0.902429	0.901757	0.900328
pH 3.4	0.860958	0.860788	0.850413	0.813093	0.746357	0.730579	0.726666	0.725301	0.728862	0.737082	0.750219	0.761132	0.772046	0.780975	0.788442	0.796493	0.802023	0.808123	0.812616	0.817956	0.821298	0.825984	0.828884	0.832627	0.834291	0.836766	0.8377	0.838914	0.839761	0.842062	0.843051	0.845896	0.847956	0.851526	0.855098	0.858064	0.863049	0.865826	0.870085	0.871797	0.874413	0.87528	0.876183	0.876547	0.877032	0.876661	0.876441	0.87572	0.87508
pH 3.4	0.918908	0.914499	0.905264	0.86629	0.807707	0.790897	0.790322	0.792007	0.797824	0.806156	0.817192	0.824507	0.831155	0.835782	0.840778	0.847599	0.853371	0.859864	0.865504	0.871791	0.875599	0.880764	0.884152	0.887545	0.889474	0.891108	0.892181	0.892183	0.891968	0.893053	0.892926	0.893065	0.893493	0.894242	0.895955	0.897904	0.901493	0.904243	0.907949	0.910546	0.913824	0.915238	0.917139	0.919116	0.920491	0.921235	0.920558	0.920416	0.91964
pH 3.4	0.888897	0.88478	0.881189	0.853208	0.813175	0.800681	0.795264	0.793549	0.798095	0.807506	0.822473	0.835454	0.847524	0.857703	0.865583	0.874226	0.880366	0.885807	0.889273	0.892558	0.893244	0.894883	0.894639	0.895418	0.895461	0.896479	0.897794	0.899369	0.90179	0.905606	0.909477	0.913514	0.917183	0.92074	0.922688	0.924675	0.926763	0.926146	0.927406	0.925544	0.925192	0.923575	0.92227	0.920713	0.920856	0.920196	0.920457	0.921001	0.922216
pH 3.4	0.896462	0.892781	0.883677	0.853051	0.800596	0.78387	0.780053	0.780169	0.785562	0.795435	0.810069	0.822142	0.832484	0.83983	0.846374	0.85311	0.858435	0.864422	0.868725	0.873741	0.876184	0.879697	0.880877	0.882849	0.883651	0.884963	0.885928	0.887253	0.889219	0.892341	0.894513	0.897925	0.900739	0.903933	0.906057	0.90771	0.910749	0.910919	0.913067	0.912352	0.913121	0.912872	0.912594	0.912305	0.91294	0.913311	0.91376	0.914381	0.915153
pH 5.73	0.896992	0.893087	0.883123	0.8506	0.795595	0.778427	0.774639	0.772988	0.777296	0.784743	0.797391	0.807969	0.816597	0.82312	0.828448	0.834637	0.838401	0.843923	0.847542	0.851827	0.854417	0.85851	0.861726	0.865194	0.867733	0.87049	0.872774	0.874861	0.876147	0.878911	0.880766	0.882764	0.884407	0.885583	0.887026	0.888597	0.890248	0.891167	0.892946	0.893059	0.894453	0.8948	0.895413	0.895377	0.895962	0.896206	0.897091	0.896886	0.897346
pH 5.73	0.886161	0.878393	0.871203	0.831568	0.757561	0.736235	0.731197	0.728353	0.731747	0.738936	0.751397	0.760363	0.770207	0.776869	0.781956	0.788344	0.792574	0.797624	0.801637	0.806255	0.808885	0.812892	0.815943	0.819534	0.821727	0.82452	0.826301	0.828387	0.829724	0.832144	0.833654	0.836344	0.837388	0.83869	0.840168	0.841327	0.843712	0.844625	0.846315	0.846077	0.848161	0.848052	0.848484	0.848901	0.849966	0.849943	0.850985	0.851422	0.851831
pH 5.73	0.912977	0.908585	0.90443	0.884213	0.833919	0.818915	0.815662	0.815153	0.819084	0.828079	0.841578	0.85239	0.862573	0.868845	0.874493	0.880987	0.885455	0.890142	0.894063	0.898667	0.901486	0.904877	0.908524	0.912143	0.914714	0.917389	0.919404	0.921077	0.922754	0.924781	0.926137	0.928372	0.929916	0.930473	0.931556	0.933081	0.935241	0.936079	0.93731	0.937109	0.938596	0.938241	0.939394	0.939558	0.939982	0.94034	0.940468	0.941484	0.942014
pH 5.73	0.918321	0.915058	0.907727	0.874747	0.818637	0.802975	0.797954	0.795328	0.799652	0.80828	0.821103	0.832214	0.840951	0.847726	0.853348	0.859503	0.8633	0.868676	0.872126	0.876489	0.878836	0.883117	0.886073	0.889388	0.891798	0.89424	0.896609	0.898253	0.899155	0.901466	0.903078	0.904927	0.906402	0.906572	0.908012	0.909133	0.910559	0.911348	0.912668	0.912992	0.913971	0.914453	0.91439	0.91406	0.914484	0.914584	0.914875	0.914932	0.914829
pH 5.73	0.920128	0.913574	0.903041	0.863674	0.812068	0.795344	0.792278	0.791004	0.795471	0.804409	0.816505	0.827298	0.837035	0.843528	0.849169	0.855076	0.859399	0.864436	0.868479	0.872771	0.875451	0.879756	0.882488	0.885465	0.888339	0.891017	0.892879	0.894437	0.89631	0.89858	0.899849	0.901865	0.903086	0.904362	0.905938	0.906922	0.908956	0.909778	0.911453	0.911685	0.913404	0.913549	0.913665	0.913874	0.915101	0.915628	0.916314	0.916777	0.917431
pH 5.73	0.909233	0.900682	0.894333	0.859264	0.801758	0.785314	0.78244	0.781321	0.785852	0.795018	0.808038	0.819559	0.829042	0.835678	0.841693	0.847909	0.852499	0.857725	0.861786	0.865956	0.868823	0.872976	0.876115	0.879835	0.882483	0.885486	0.887769	0.889639	0.8916	0.893842	0.895851	0.897949	0.899424	0.900962	0.902575	0.904028	0.906532	0.907479	0.909001	0.909489	0.910882	0.911388	0.911874	0.912042	0.912899	0.913394	0.914308	0.914368	0.915348
pH 5.73	0.90583	0.903612	0.893517	0.850325	0.791315	0.777487	0.774066	0.773435	0.778125	0.786385	0.798147	0.808151	0.816816	0.822708	0.827882	0.83355	0.837491	0.842549	0.846261	0.85047	0.852483	0.856692	0.859086	0.862222	0.864037	0.866245	0.868463	0.869991	0.870893	0.873499	0.874515	0.876273	0.87741	0.878336	0.879307	0.880144	0.882439	0.882327	0.884495	0.884328	0.885828	0.885687	0.885826	0.886049	0.886677	0.88712	0.888139	0.888208	0.887832
pH 5.73	0.909793	0.911172	0.904642	0.861617	0.79772	0.780856	0.778508	0.778656	0.782725	0.792138	0.805717	0.817711	0.827614	0.834511	0.840574	0.847052	0.851672	0.856563	0.860821	0.865633	0.868154	0.872671	0.875857	0.879955	0.882128	0.884809	0.887621	0.889974	0.891501	0.894126	0.896221	0.898964	0.900423	0.901625	0.903209	0.904713	0.907317	0.90846	0.909833	0.91032	0.91163	0.911992	0.912915	0.913171	0.913769	0.914524	0.915293	0.916308	0.916418
pH 8.06	0.899237	0.895072	0.889937	0.857841	0.796662	0.776561	0.771954	0.770377	0.77373	0.781864	0.794575	0.804263	0.813786	0.820846	0.826807	0.832629	0.837389	0.84296	0.846569	0.851297	0.85465	0.859146	0.86211	0.865653	0.868435	0.871171	0.873026	0.875507	0.876915	0.879954	0.88157	0.884037	0.885224	0.887256	0.888796	0.889839	0.892541	0.893573	0.895235	0.895813	0.896908	0.897543	0.897811	0.898746	0.899538	0.900222	0.901161	0.901789	0.902431
pH 8.06	0.877379	0.870311	0.862288	0.824945	0.762831	0.742819	0.737461	0.734878	0.739187	0.745626	0.758604	0.768409	0.776988	0.784012	0.789383	0.795317	0.800063	0.804926	0.808844	0.8138	0.816598	0.821417	0.823692	0.827619	0.829659	0.8325	0.834481	0.83667	0.837972	0.841079	0.842393	0.845138	0.84664	0.848138	0.850264	0.851414	0.853754	0.854485	0.857068	0.85737	0.858831	0.859	0.859869	0.860411	0.860872	0.862088	0.862952	0.863597	0.864309
pH 8.06	0.83316	0.828244	0.81937	0.782553	0.715539	0.692854	0.685937	0.683176	0.685968	0.693502	0.704658	0.71373	0.722533	0.729195	0.735296	0.741077	0.745784	0.751194	0.755241	0.760977	0.763936	0.768639	0.771508	0.776045	0.778326	0.781616	0.783289	0.786171	0.787379	0.791093	0.792484	0.795465	0.79664	0.798565	0.800747	0.801753	0.804608	0.80585	0.808199	0.808233	0.81032	0.810808	0.811081	0.812208	0.813704	0.814448	0.815633	0.816347	0.817285
pH 8.06	0.901548	0.892081	0.88521	0.838524	0.77872	0.76125	0.758359	0.75637	0.760105	0.768594	0.780247	0.789564	0.798436	0.804912	0.810613	0.815913	0.8204	0.825357	0.828939	0.833384	0.836363	0.840358	0.84305	0.846818	0.848582	0.851324	0.85268	0.854964	0.856137	0.858829	0.859763	0.86205	0.863134	0.864255	0.866094	0.866615	0.86921	0.869687	0.871539	0.871551	0.873089	0.873628	0.873489	0.874088	0.875085	0.875634	0.87635	0.877082	0.877429
pH 8.06	0.888131	0.882137	0.871465	0.827057	0.762254	0.741942	0.737977	0.736557	0.740451	0.748535	0.761071	0.770382	0.779473	0.786018	0.791858	0.796601	0.801542	0.806286	0.809902	0.81453	0.817591	0.82189	0.824232	0.828249	0.830013	0.833082	0.834492	0.836664	0.838038	0.840637	0.841618	0.844014	0.845449	0.846831	0.848592	0.849022	0.851755	0.852405	0.854848	0.854691	0.856174	0.8567	0.857003	0.857457	0.858597	0.85956	0.86052	0.860942	0.861814
pH 8.06	0.906692	0.89907	0.893948	0.857657	0.798433	0.775691	0.768905	0.765816	0.768802	0.776813	0.789817	0.799375	0.809107	0.815683	0.821758	0.827604	0.832348	0.837394	0.841161	0.846131	0.849036	0.85332	0.856355	0.860066	0.862513	0.865603	0.867365	0.869758	0.871137	0.874397	0.87612	0.878657	0.880461	0.882314	0.884355	0.885636	0.888276	0.889643	0.891841	0.892506	0.893871	0.894529	0.895655	0.896382	0.897713	0.898667	0.900146	0.901231	0.902391
pH 10.7	0.783385	0.76762	0.768932	0.725026	0.669303	0.644903	0.635157	0.629265	0.61805	0.590475	0.565829	0.557159	0.555264	0.556751	0.55897	0.564024	0.566984	0.572576	0.57451	0.581114	0.583963	0.590127	0.593383	0.598587	0.601352	0.60606	0.609122	0.613061	0.615946	0.619808	0.623131	0.626679	0.629483	0.632916	0.635953	0.638814	0.64242	0.645033	0.648358	0.649976	0.65321	0.654831	0.65662	0.659977	0.663255	0.66503	0.668288	0.670824	0.673829
pH 10.7	0.724887	0.712966	0.701879	0.668857	0.613754	0.593067	0.584846	0.581157	0.57579	0.561251	0.544876	0.534413	0.531917	0.531962	0.532658	0.535527	0.537371	0.543277	0.545533	0.550433	0.553458	0.55779	0.560898	0.564556	0.567434	0.570599	0.573385	0.575878	0.579044	0.581829	0.585032	0.587231	0.590353	0.593531	0.595544	0.598612	0.601264	0.604179	0.606798	0.609289	0.610843	0.612029	0.614983	0.61775	0.619611	0.622752	0.624823	0.626978	0.629943
pH 10.7	0.808496	0.796121	0.791895	0.751133	0.692904	0.671303	0.668017	0.660289	0.661042	0.662544	0.662945	0.664265	0.668183	0.672238	0.675173	0.679918	0.682729	0.688456	0.691607	0.696488	0.699502	0.704217	0.707201	0.71108	0.714079	0.717033	0.719655	0.722159	0.72461	0.727624	0.72988	0.732858	0.735762	0.738393	0.740887	0.743206	0.745793	0.747899	0.75041	0.751802	0.75335	0.754215	0.756576	0.758101	0.759548	0.761423	0.76263	0.764068	0.765365
pH 10.7	0.853302	0.842977	0.835271	0.798729	0.736057	0.720307	0.713798	0.710928	0.701663	0.689275	0.682735	0.683441	0.685229	0.691772	0.696405	0.703282	0.709023	0.716368	0.720081	0.727854	0.732109	0.739345	0.742518	0.749243	0.752031	0.758128	0.761246	0.765655	0.768594	0.773519	0.77712	0.781081	0.78443	0.78822	0.791681	0.794516	0.798016	0.800583	0.803922	0.805371	0.808306	0.809612	0.811175	0.814321	0.817035	0.818791	0.821088	0.82226	0.82485
pH 10.7	0.820693	0.813225	0.801134	0.766247	0.708308	0.684891	0.682159	0.677989	0.678782	0.681143	0.689975	0.69267	0.696671	0.699647	0.701582	0.705684	0.711819	0.720607	0.726489	0.732505	0.735807	0.741034	0.744224	0.748001	0.750633	0.753897	0.755501	0.758497	0.760342	0.763142	0.765216	0.76759	0.769513	0.771596	0.773707	0.776139	0.778882	0.781171	0.78364	0.784771	0.786635	0.787771	0.789708	0.792717	0.795204	0.79714	0.79944	0.800706	0.803585
pH 10.7	0.840247	0.832928	0.81757	0.785179	0.724539	0.702641	0.702821	0.699466	0.705102	0.711501	0.726133	0.736887	0.748527	0.756538	0.7632	0.770577	0.776731	0.78327	0.788743	0.793818	0.797539	0.802899	0.805817	0.809907	0.812103	0.814955	0.816868	0.819134	0.820404	0.823606	0.824549	0.826872	0.82828	0.829642	0.831694	0.832653	0.83486	0.83571	0.8377	0.837668	0.838842	0.839029	0.839667	0.840151	0.840976	0.841708	0.842645	0.84258	0.843144
pH 10.7	0.844879	0.836088	0.825028	0.788885	0.727763	0.706703	0.705023	0.697701	0.700451	0.698222	0.691785	0.69086	0.695342	0.700015	0.704721	0.712133	0.718615	0.727688	0.733545	0.74007	0.744677	0.750505	0.754086	0.757991	0.7613	0.764106	0.766112	0.768666	0.770175	0.773262	0.774894	0.777538	0.779265	0.781081	0.782975	0.784499	0.787418	0.788802	0.791005	0.791921	0.793279	0.793998	0.795558	0.797007	0.798456	0.800008	0.801439	0.802111	0.803268
pH 10.7	0.844444	0.829931	0.827907	0.789022	0.729911	0.7086	0.705918	0.705631	0.709602	0.725336	0.747018	0.759607	0.767536	0.773138	0.776303	0.780101	0.78374	0.787899	0.790979	0.794629	0.79585	0.79965	0.800529	0.803787	0.804241	0.806611	0.806995	0.809164	0.809268	0.811483	0.812988	0.814327	0.816537	0.817252	0.818748	0.820834	0.822396	0.823795	0.826329	0.82671	0.827847	0.828644	0.829521	0.830537	0.831982	0.833222	0.833602	0.834129	0.835917
[truncated: 76 more columns]
